# Supplementary material for: Discovery of Novel Pterostilbene Derivatives That Might Treat Sepsis by Attenuating Oxidative Stress and Inflammation through Modulation of MAPKs/NF-κB Signaling Pathways
Source: MDPI journal article supplement (doi:10.3390/antiox10091333), 2021-08-24

## Supplementary Materials

### **Discovery of Novel Pterostilbene Derivatives That Might Treat Sepsis by Attenuating Oxidative Stress and Inflammation through Modulation of MAPKs/NF- $\kappa$ B Signaling Pathways**

Mengyuan Fang<sup>1, #</sup>, Tingfeng Zou<sup>1, #</sup>, Xiaoxiao Yang<sup>1, \*</sup>, Zhen Zhang<sup>1</sup>, Peichang Cao<sup>1</sup>,  
Jihong Han<sup>1</sup>, Yajun Duan<sup>1</sup>, Ban-Feng Ruan<sup>2, \*</sup>, Qing-Shan Li<sup>1, \*</sup>

<sup>1</sup> Key Laboratory of Metabolism and Regulation for Major Diseases of Anhui Higher Education Institutes, College of Food and Biological Engineering, Hefei University of Technology, Hefei, 230601, P.R. China

<sup>2</sup> Key Lab of Biofabrication of Anhui Higher Education Institution Centre for Advanced Biofabrication, Hefei University, Hefei, 230601, P.R. China

<sup>#</sup> Both authors Mengyuan Fang and Tingfeng Zou contributed equally to this work.

\*Corresponding authors: Qing-Shan Li, e-mail: [liqs@hfut.edu.cn](mailto:liqs@hfut.edu.cn); Ban-Feng Ruan, e-mail: [ruanbf@hfu.edu.cn](mailto:ruanbf@hfu.edu.cn); Xiaoxiao Yang, e-mail: [yangxiaoxiao@hfut.edu.cn](mailto:yangxiaoxiao@hfut.edu.cn);

## Contents

|                                                                                                      |           |
|------------------------------------------------------------------------------------------------------|-----------|
| <b>Table S1. The sequences of primers for qRT-PCR analysis. ....</b>                                 | <b>3</b>  |
| <b><sup>1</sup>H NMR, <sup>13</sup>C NMR and HR-MS data. ....</b>                                    | <b>4</b>  |
| <b><sup>1</sup>H NMR, <sup>13</sup>C NMR and HR-MS spectra of representative<br/>compounds. ....</b> | <b>11</b> |

**1. Table S1. The sequences of primers for qRT-PCR analysis.**

| Gene            | Forward primer       | Reverse primer           |
|-----------------|----------------------|--------------------------|
| m-IL-1 $\beta$  | GACCTTCCAGGATGAGGACA | AGCTCATATGGGTCCGACAG     |
| m-TNF- $\alpha$ | CGTCGTAGCAAACCACCAAG | TTGAAGAGAACCTGGGAGTAGACA |
| m-GAPDH         | ACCCAGAAGACTGTGGATGG | ACACATTGGGGGTAGGAACA     |

## 2. $^1\text{H}$ NMR, $^{13}\text{C}$ NMR and HR-MS data.

$^1\text{H}$  and  $^{13}\text{C}$  NMR (nuclear magnetic resonance) spectra were recorded using an Agilent 400 MHz spectrometer (Agilent Technologies, Palo Alto, CA) with  $\text{CDCl}_3$  or  $\text{DMSO-d}_6$  as the solvents and TMS as the internal standard. The signals were quoted as follows: chemical shift, multiplicity (s = singlet, d = doublet, t = triplet, q = quartet, dd = double of doublets, m = multiplet), coupling constants, and integration. High-resolution electron impact mass spectra (HR-MS) were recorded under electron impact (70 eV) condition by Micro Mass GCT CA 055 instrument. Melting points were determined on a XT4MP apparatus (Taikang Corp., Beijing, China), and uncorrected.

*2-((E)-2-((E)-4-ethoxystyryl)-4,6-dimethoxybenzylidene)-4,5,6-trimethoxy-2,3-dihydro-1H-inden-1-one (PIF\_1)*. Yellow solid, Yield: 61.2%, m.p. 165-167°C.  $^1\text{H}$  NMR (400 MHz,  $\text{CDCl}_3$ )  $\delta$  (ppm) 7.82 (t,  $J = 2.0$  Hz, 1H), 7.41 – 7.35 (m, 2H), 7.28 (s, 1H), 7.21 (s, 1H), 7.10 – 6.97 (m, 2H), 6.86 – 6.81 (m, 3H), 6.46 (d,  $J = 2.2$  Hz, 1H), 4.03 (q,  $J = 7.0$  Hz, 2H), 3.94 (dd,  $J = 5.5, 3.0$  Hz, 9H), 3.84 (d,  $J = 5.4$  Hz, 3H), 3.78 (s, 3H), 3.48 (d,  $J = 2.0$  Hz, 2H), 1.42 (t,  $J = 7.0$  Hz, 3H).  $^{13}\text{C}$  NMR (101 MHz,  $\text{CDCl}_3$ )  $\delta$  (ppm) 192.75, 161.02, 158.95, 158.89, 154.09, 149.74, 147.56, 139.03, 138.70, 136.45, 133.96, 130.59, 129.76, 129.68, 127.97, 124.90, 116.86, 114.68, 101.59, 101.44, 97.51, 63.48, 61.13, 60.46, 56.31, 55.66, 55.48, 28.67, 14.80. HR-MS (ESI): calcd. for  $\text{C}_{31}\text{H}_{32}\text{O}_7$ ,  $[\text{M} + \text{H}]^+$ , 517.2221; found 517.2282.

*2-((E)-2-((E)-4-ethoxystyryl)-4,6-dimethoxybenzylidene)-5,6-dimethoxy-2,3-dihydro-1H-inden-1-one (PIF\_2)*. Yellow solid, Yield: 55.7%, m.p.: 161-162°C.  $^1\text{H}$  NMR (400 MHz,  $\text{CDCl}_3$ )  $\delta$  (ppm) 7.79 (t,  $J = 1.8$  Hz, 1H), 7.41 – 7.35 (m, 3H), 7.11 – 7.00 (m, 2H), 6.85 (dd,  $J = 5.5, 3.2$  Hz, 3H), 6.80 (s, 1H), 6.45 (d,  $J = 2.1$  Hz, 1H), 4.04 (q,  $J = 7.0$  Hz, 2H), 3.96 (s, 3H), 3.93 (s, 6H), 3.85 (s, 3H), 3.48 (d,  $J = 1.4$  Hz, 2H), 1.42 (t,  $J = 7.0$  Hz, 3H).  $^{13}\text{C}$  NMR (101 MHz,  $\text{CDCl}_3$ )  $\delta$  (ppm) 192.59, 160.89, 158.96, 158.94, 155.20, 149.35, 145.39, 139.72, 138.50, 131.45, 130.23, 129.69, 128.61, 127.97, 124.83, 117.18, 114.72, 107.26, 105.05, 101.32, 97.49, 63.49, 56.20, 56.17, 55.64,

55.46, 31.52, 14.80. MS (ESI): calcd. for C<sub>30</sub>H<sub>30</sub>O<sub>6</sub>, [M + H]<sup>+</sup>, 487.2115; found 487.2111

*2-((E)-2-((E)-4-ethoxystyryl)-4,6-dimethoxybenzylidene)-5,7-dimethoxy-2,3-dihydro-1H-inden-1-one (PIF\_3)*. Yellow solid, Yield: 50.3%, m.p.: 177-179°C. <sup>1</sup>H NMR (400 MHz, CDCl<sub>3</sub>) δ (ppm) 7.71 (t, *J* = 2.0 Hz, 1H), 7.42 – 7.36 (m, 2H), 7.05 (s, 2H), 6.85 (dd, *J* = 9.2, 2.4 Hz, 3H), 6.44 (d, *J* = 2.2 Hz, 1H), 6.40 (d, *J* = 1.6 Hz, 1H), 6.33 (d, *J* = 1.7 Hz, 1H), 4.04 (q, *J* = 7.0 Hz, 2H), 3.97 (s, 3H), 3.92 (s, 3H), 3.84 (d, *J* = 7.2 Hz, 6H), 3.47 (d, *J* = 1.7 Hz, 2H), 1.42 (t, *J* = 7.0 Hz, 3H). <sup>13</sup>C NMR (101 MHz, CDCl<sub>3</sub>) δ (ppm) 190.31, 166.64, 160.72, 160.08, 158.91, 158.78, 154.99, 139.77, 138.51, 130.09, 129.71, 127.97, 127.48, 124.74, 121.01, 117.26, 114.69, 101.43, 101.16, 97.52, 97.34, 63.48, 55.84, 55.70, 55.63, 55.45, 32.12, 14.82. MS (ESI): calcd. for C<sub>30</sub>H<sub>30</sub>O<sub>6</sub>, [M + H]<sup>+</sup>, 487.2115; found 487.2166

*2-((E)-2,4-dimethoxy-6-((E)-4-(2-methoxyethoxy)styryl)benzylidene)-4,5,6-trimethoxy-2,3-dihydro-1H-inden-1-one (PIF\_4)*. Yellow solid, Yield: 44.8%, m.p.: 149-151°C. <sup>1</sup>H NMR (400 MHz, CDCl<sub>3</sub>) δ (ppm) 7.81 (s, 1H), 7.38 (d, *J* = 8.8 Hz, 2H), 7.21 (s, 1H), 7.04 (q, *J* = 16.2 Hz, 2H), 6.88 (d, *J* = 8.8 Hz, 2H), 6.84 (d, *J* = 2.2 Hz, 1H), 6.46 (d, *J* = 2.2 Hz, 1H), 4.15 – 4.10 (m, 2H), 3.96 – 3.92 (m, 9H), 3.85 (s, 3H), 3.79 – 3.74 (m, 5H), 3.48 (d, *J* = 2.0 Hz, 2H), 3.46 (s, 3H). <sup>13</sup>C NMR (101 MHz, CDCl<sub>3</sub>) δ (ppm) 192.74, 161.02, 158.88, 158.75, 154.10, 149.74, 147.57, 139.04, 138.65, 136.44, 133.95, 130.50, 130.04, 129.73, 127.94, 125.09, 116.88, 114.82, 101.59, 101.46, 97.55, 70.97, 67.27, 61.14, 60.47, 59.27, 56.31, 55.66, 55.48, 28.66. MS (ESI): calcd. for C<sub>32</sub>H<sub>34</sub>O<sub>8</sub>, [M + H]<sup>+</sup>, 547.2326; found 547.2382

*2-((E)-2,4-dimethoxy-6-((E)-4-(2-methoxyethoxy)styryl)benzylidene)-5,6-dimethoxy-2,3-dihydro-1H-inden-1-one (PIF\_5)*. Yellow solid, Yield: 42.3%, m.p.: 171-174°C. <sup>1</sup>H NMR (400 MHz, CDCl<sub>3</sub>) δ (ppm) 7.78 (s, 1H), 7.43 – 7.33 (m, 3H), 7.03 (d, *J* = 16.7 Hz, 2H), 6.92 – 6.82 (m, 3H), 6.80 (s, 1H), 6.45 (s, 1H), 4.18 – 4.10 (m, 3H), 3.95

(d,  $J = 12.0$  Hz, 9H), 3.84 (s, 3H), 3.79 – 3.71 (m, 2H), 3.54 – 3.40 (m, 5H).  $^{13}\text{C}$  NMR (101 MHz,  $\text{CDCl}_3$ )  $\delta$  (ppm) 192.59, 160.89, 158.93, 158.77, 155.21, 149.36, 145.39, 139.74, 138.45, 131.44, 130.16, 130.06, 128.58, 127.94, 125.04, 117.20, 114.86, 107.25, 105.05, 101.34, 97.53, 70.98, 67.30, 60.41, 59.25, 56.21, 56.18, 55.64, 55.47, 31.52, 21.08, 14.21. MS (ESI): calcd. for  $\text{C}_{31}\text{H}_{32}\text{O}_7$ ,  $[\text{M} + \text{H}]^+$ , 517.2221; found 517.2267

*2-((E)-2,4-dimethoxy-6-((E)-4-(2-methoxyethoxy)styryl)benzylidene)-5,7-dimethoxy-2,3-dihydro-1H-inden-1-one (PIF\_6)*. Yellow solid, Yield: 55.7%, Mp: 155-158°C.  $^1\text{H}$  NMR (400 MHz,  $\text{CDCl}_3$ )  $\delta$  (ppm) 7.71 (d,  $J = 2.0$  Hz, 1H), 7.38 (dd,  $J = 8.6, 4.2$  Hz, 2H), 7.04 (d,  $J = 4.2$  Hz, 2H), 6.88 (dd,  $J = 8.6, 4.2$  Hz, 2H), 6.83 (d,  $J = 2.1$  Hz, 1H), 6.40 (dd,  $J = 30.9, 15.4$  Hz, 3H), 4.13 (dd,  $J = 9.1, 4.4$  Hz, 2H), 3.96 (d,  $J = 4.3$  Hz, 3H), 3.91 (d,  $J = 4.4$  Hz, 3H), 3.83 (dd,  $J = 7.5, 4.3$  Hz, 6H), 3.76 (dd,  $J = 9.1, 4.4$  Hz, 2H), 3.46 (d,  $J = 4.4$  Hz, 5H).  $^{13}\text{C}$  NMR (101 MHz,  $\text{CDCl}_3$ )  $\delta$  (ppm) 190.25, 166.65, 160.73, 160.09, 158.78, 158.72, 154.96, 139.78, 138.48, 130.10, 130.03, 127.93, 127.43, 124.98, 121.03, 117.31, 114.85, 101.44, 101.24, 97.59, 97.36, 70.99, 67.29, 59.24, 55.83, 55.68, 55.63, 55.44, 32.10. MS (ESI): calcd. for  $\text{C}_{31}\text{H}_{32}\text{O}_7$ ,  $[\text{M} + \text{H}]^+$ , 517.2221; found 517.2285

*2-((E)-2,4-dimethoxy-6-((E)-4-propoxystyryl)benzylidene)-4,5,6-trimethoxy-2,3-dihydro-1H-inden-1-one (PIF\_7)*. Yellow solid, Yield: 58.9%, m.p.: 188-190°C.  $^1\text{H}$  NMR (400 MHz,  $\text{CDCl}_3$ )  $\delta$  (ppm) 7.82 (t,  $J = 2.0$  Hz, 1H), 7.42 – 7.35 (m, 2H), 7.21 (s, 1H), 7.04 (q,  $J = 16.2$  Hz, 2H), 6.87 – 6.81 (m, 3H), 6.46 (d,  $J = 2.2$  Hz, 1H), 3.95 – 3.92 (m, 10H), 3.85 (s, 3H), 3.78 (s, 3H), 3.48 (d,  $J = 2.0$  Hz, 2H), 1.89 – 1.74 (m, 2H), 1.04 (t,  $J = 7.4$  Hz, 3H).  $^{13}\text{C}$  NMR (101 MHz,  $\text{CDCl}_3$ )  $\delta$  (ppm) 192.72, 161.03, 159.17, 158.90, 154.10, 149.75, 147.57, 139.03, 138.71, 136.44, 133.97, 130.61, 129.76, 129.64, 127.94, 124.87, 116.88, 114.72, 101.60, 101.47, 97.52, 69.54, 61.12, 60.44, 56.30, 55.66, 55.47, 28.66, 22.54, 10.50. MS (ESI): calcd. for  $\text{C}_{32}\text{H}_{34}\text{O}_7$ ,  $[\text{M} + \text{H}]^+$ , 531.2383; found 531.2379.

*2-((E)-2,4-dimethoxy-6-((E)-4-propoxystyryl)benzylidene)-5,6-dimethoxy-2,3-dihydro-1H-inden-1-one (PIF\_8)*. Yellow solid, Yield: 40.2%, m.p.: 192-194°C. <sup>1</sup>H NMR (400 MHz, CDCl<sub>3</sub>) δ (ppm) 7.79 (s, 1H), 7.42 – 7.34 (m, 3H), 7.12 – 6.99 (m, 2H), 6.85 (dd, *J* = 5.6, 3.2 Hz, 3H), 6.80 (s, 1H), 6.45 (d, *J* = 2.2 Hz, 1H), 3.96 (s, 3H), 3.92 (dd, *J* = 7.7, 3.7 Hz, 8H), 3.84 (s, 3H), 3.48 (d, *J* = 1.7 Hz, 2H), 1.88 – 1.75 (m, 2H), 1.04 (t, *J* = 7.4 Hz, 3H). <sup>13</sup>C NMR (101 MHz, CDCl<sub>3</sub>) δ (ppm) 192.59, 160.89, 159.17, 158.95, 155.19, 149.35, 145.39, 139.72, 138.49, 131.45, 130.24, 129.63, 128.62, 127.95, 124.80, 117.19, 114.75, 107.26, 105.05, 101.30, 97.47, 69.54, 56.20, 56.17, 55.64, 55.46, 31.52, 22.55, 10.51. MS (ESI): calcd. for C<sub>31</sub>H<sub>32</sub>O<sub>6</sub>, [M + H]<sup>+</sup>, 501.2272; found 501.2267

*2-((E)-2,4-dimethoxy-6-((E)-4-propoxystyryl)benzylidene)-5,7-dimethoxy-2,3-dihydro-1H-inden-1-one (PIF\_9)*. Yellow solid, Yield: 44.8%, m.p.: 167-169°C. <sup>1</sup>H NMR (400 MHz, CDCl<sub>3</sub>) δ (ppm) 7.71 (s, 1H), 7.38 (d, *J* = 8.7 Hz, 2H), 7.04 (s, 2H), 6.85 (d, *J* = 8.6 Hz, 3H), 6.48 – 6.36 (m, 2H), 6.33 (d, *J* = 1.4 Hz, 1H), 3.96 (d, *J* = 8.1 Hz, 3H), 3.95 – 3.89 (m, 5H), 3.84 (d, *J* = 7.3 Hz, 6H), 3.47 (s, 2H), 1.87 – 1.76 (m, 2H), 1.04 (t, *J* = 7.4 Hz, 3H). <sup>13</sup>C NMR (101 MHz, CDCl<sub>3</sub>) δ (ppm) 190.29, 166.65, 160.73, 160.09, 159.12, 158.79, 154.98, 139.76, 138.52, 130.12, 129.67, 127.94, 127.50, 124.72, 121.02, 117.28, 114.73, 101.45, 101.20, 97.53, 97.35, 69.54, 55.83, 55.69, 55.63, 55.44, 32.11, 22.56, 10.52. MS (ESI): calcd. for C<sub>31</sub>H<sub>32</sub>O<sub>6</sub>, [M + H]<sup>+</sup>, 501.2272; found 501.2274

*2-((E)-2,4-dimethoxy-6-((E)-4-methoxystyryl)benzylidene)-4,5,6-trimethoxy-2,3-dihydro-1H-inden-1-one (PIF\_10)*. Yellow solid, Yield: 62.1%, m.p.: 178-181°C. <sup>1</sup>H NMR (400 MHz, CDCl<sub>3</sub>) δ (ppm) 7.82 (s, 1H), 7.40 (d, *J* = 8.8 Hz, 2H), 7.21 (s, 1H), 7.05 (q, *J* = 16.2 Hz, 2H), 6.90 – 6.82 (m, 3H), 6.46 (d, *J* = 2.2 Hz, 1H), 3.99 – 3.89 (m,

9H), 3.85 (s, 3H), 3.81 (s, 3H), 3.78 (s, 3H), 3.48 (d,  $J = 2.0$  Hz, 2H).  $^{13}\text{C}$  NMR (101 MHz,  $\text{CDCl}_3$ )  $\delta$  (ppm) 192.70, 161.04, 159.57, 158.90, 154.12, 149.75, 147.57, 139.04, 138.67, 136.43, 133.97, 130.53, 129.86, 129.73, 127.96, 125.04, 116.90, 114.17, 101.61, 101.51, 97.56, 61.12, 60.44, 56.30, 55.66, 55.47, 55.31, 28.66. MS (ESI): calcd. for  $\text{C}_{30}\text{H}_{30}\text{O}_7$ ,  $[\text{M} + \text{H}]^+$ , 503.2064; found 503.2060

*2-((E)-2,4-dimethoxy-6-((E)-4-methoxystyryl)benzylidene)-5,7-dimethoxy-2,3-dihydro-1H-inden-1-one (PIF\_11)*. Yellow solid, Yield: 39.6%, Mp: 197-199°C.  $^1\text{H}$  NMR (400 MHz,  $\text{CDCl}_3$ )  $\delta$  (ppm) 7.72 (s, 1H), 7.40 (d,  $J = 8.6$  Hz, 2H), 7.05 (s, 2H), 6.85 (dd,  $J = 8.3, 5.4$  Hz, 3H), 6.48 – 6.38 (m, 2H), 6.33 (s, 1H), 3.97 (s, 3H), 3.93 (d,  $J = 4.4$  Hz, 3H), 3.87 – 3.80 (m, 9H), 3.47 (d,  $J = 0.9$  Hz, 2H).  $^{13}\text{C}$  NMR (101 MHz,  $\text{CDCl}_3$ )  $\delta$  (ppm) 190.29, 166.66, 160.73, 160.10, 159.52, 158.79, 154.98, 139.77, 138.47, 130.04, 129.89, 127.97, 127.50, 124.90, 121.02, 117.30, 114.18, 101.44, 101.21, 97.56, 97.35, 55.84, 55.69, 55.64, 55.45, 55.33, 32.11. MS (ESI): calcd. for  $\text{C}_{29}\text{H}_{28}\text{O}_6$ ,  $[\text{M} + \text{H}]^+$ , 473.1959; found 473.1955

*2-((E)-2,4-dimethoxy-6-((E)-4-(prop-2-yn-1-yloxy)styryl)benzylidene)-4,5,6-trimethoxy-2,3-dihydro-1H-inden-1-one (PIF\_12)*. Yellow solid, Yield: 45.3%, m.p.: 180-181°C.  $^1\text{H}$  NMR (400 MHz,  $\text{CDCl}_3$ )  $\delta$  (ppm) 7.81 (s, 1H), 7.41 (d,  $J = 8.8$  Hz, 2H), 7.21 (s, 1H), 7.11 – 6.99 (m, 2H), 6.93 (d,  $J = 8.7$  Hz, 2H), 6.84 (d,  $J = 2.2$  Hz, 1H), 6.47 (d,  $J = 2.2$  Hz, 1H), 4.70 (d,  $J = 2.4$  Hz, 2H), 3.99 – 3.90 (m, 9H), 3.85 (s, 3H), 3.78 (s, 3H), 3.48 (d,  $J = 1.9$  Hz, 2H), 2.53 (t,  $J = 2.4$  Hz, 1H).  $^{13}\text{C}$  NMR (101 MHz,  $\text{CDCl}_3$ )  $\delta$  (ppm) 192.70, 161.04, 158.89, 157.42, 154.13, 149.75, 147.59, 139.07, 138.55, 136.44, 133.95, 130.74, 130.34, 129.69, 127.93, 125.54, 116.95, 115.15, 114.97, 101.62, 97.63, 78.35, 75.69, 61.12, 60.46, 56.31, 55.81, 55.67, 55.48, 28.64. MS (ESI): calcd. for  $\text{C}_{32}\text{H}_{30}\text{O}_7$ ,  $[\text{M} + \text{H}]^+$ , 527.2064 found 527.2061

*2-((E)-2,4-dimethoxy-6-((E)-4-(prop-2-yn-1-yloxy)styryl)benzylidene)-5,7-dimethoxy-2,3-dihydro-1H-inden-1-one (PIF\_13)*. Yellow solid, Yield: 51.9%, m.p.: 155-158°C.



<sup>1</sup>H NMR (400 MHz, CDCl<sub>3</sub>) δ (ppm) 7.70 (s, 1H), 7.41 (d, *J* = 8.8 Hz, 2H), 7.06 (s, 2H), 6.93 (d, *J* = 8.8 Hz, 2H), 6.83 (d, *J* = 2.1 Hz, 1H), 6.48 – 6.37 (m, 2H), 6.33 (d, *J* = 1.4 Hz, 1H), 4.72 (dd, *J* = 13.6, 2.3 Hz, 2H), 3.97 (s, 3H), 3.92 (s, 3H), 3.84 (d, *J* = 7.4 Hz, 6H), 3.46 (s, 2H), 2.54 (t, *J* = 2.3 Hz, 1H). <sup>13</sup>C NMR (101 MHz, CDCl<sub>3</sub>) δ (ppm) 190.25, 166.67, 160.74, 160.10, 158.78, 157.40, 154.95, 139.82, 138.37, 130.78, 129.87, 127.93, 127.42, 125.40, 121.01, 117.36, 115.15, 101.47, 101.31, 97.65, 97.36, 78.38, 75.68, 60.41, 55.83, 55.69, 55.64, 55.45, 32.09, 21.07, 14.21. MS (ESI): calcd. for C<sub>31</sub>H<sub>28</sub>O<sub>6</sub>, [M + H]<sup>+</sup>, 497.1959; found 497.1960

*2-((E)-2,4-dimethoxy-6-((E)-4-((4-methylbenzyl)oxy)styryl)benzylidene)-4,5,6-trimethoxy-2,3-dihydro-1H-inden-1-one (PIF\_14)*. Yellow solid, Yield: 41.6%, m.p.: 211-213°C. <sup>1</sup>H NMR (400 MHz, CDCl<sub>3</sub>) δ 7.86 – 7.77 (m, 1H), 7.39 (d, *J* = 8.8 Hz, 2H), 7.32 (d, *J* = 8.0 Hz, 2H), 7.21 (s, 2H), 7.19 (s, 1H), 7.04 (q, *J* = 16.2 Hz, 2H), 6.92 (t, *J* = 5.8 Hz, 2H), 6.84 (d, *J* = 2.2 Hz, 1H), 6.46 (d, *J* = 2.2 Hz, 1H), 5.03 (s, 2H), 4.00 – 3.88 (m, 9H), 3.85 (s, 3H), 3.77 (s, 3H), 3.49 (t, *J* = 7.3 Hz, 2H), 2.37 (s, 3H). <sup>13</sup>C NMR (101 MHz, CDCl<sub>3</sub>) δ (ppm) 192.71, 190.68, 161.03, 158.90, 158.83, 154.11, 149.75, 147.58, 139.05, 138.66, 137.82, 136.44, 133.97, 133.72, 130.53, 130.01, 129.73, 129.29, 128.38, 127.96, 127.61, 125.62, 125.09, 116.91, 115.11, 101.61, 101.50, 97.56, 69.96, 61.12, 60.45, 56.31, 55.66, 55.47, 28.66, 21.21. MS (ESI): calcd. for C<sub>37</sub>H<sub>36</sub>O<sub>7</sub>, [M + H]<sup>+</sup>, 593.2534; found 593.2537

*2-((E)-2-((E)-4-(benzyloxy)styryl)-4,6-dimethoxybenzylidene)-4,5,6-trimethoxy-2,3-dihydro-1H-inden-1-one (PIF\_15)*. Yellow solid, Yield: 37.8%, m.p.: 140-143°C. <sup>1</sup>H NMR (400 MHz, CDCl<sub>3</sub>) δ (ppm) 7.82 (s, 1H), 7.43 (t, *J* = 5.9 Hz, 3H), 7.41 – 7.37 (m, 3H), 7.36 – 7.31 (m, 1H), 7.21 (s, 1H), 7.10 – 7.02 (m, 2H), 6.92 (t, *J* = 7.8 Hz, 2H), 6.85 (d, *J* = 2.2 Hz, 1H), 6.46 (d, *J* = 2.2 Hz, 1H), 5.07 (s, 2H), 4.04 – 3.91 (m, 9H), 3.86 (d, *J* = 5.6 Hz, 3H), 3.78 (d, *J* = 8.8 Hz, 3H), 3.48 (d, *J* = 1.9 Hz, 2H). <sup>13</sup>C NMR (101 MHz, CDCl<sub>3</sub>) δ (ppm) 192.74, 161.03, 158.89, 158.74, 154.10, 149.74, 147.57, 139.05, 138.63, 136.76, 136.45, 133.96, 130.48, 130.09, 129.74, 128.62, 128.04,

127.99, 127.49, 125.15, 116.90, 115.10, 101.60, 101.47, 97.56, 70.01, 61.14, 60.47, 56.32, 55.67, 55.49, 28.66. MS (ESI): calcd. for C<sub>36</sub>H<sub>34</sub>O<sub>7</sub>, [M + H]<sup>+</sup>, 579.2477, found 579.2425

*2-((E)-2-((E)-4-isobutoxystyryl)-4,6-dimethoxybenzylidene)-5,6-dimethoxy-2,3-dihydro-1H-inden-1-one (PIF\_16)*. Yellow solid, Yield: 40.1%, m.p.: 145-148°C. <sup>1</sup>H NMR (400 MHz, CDCl<sub>3</sub>) δ (ppm) 7.79 (t, *J* = 1.9 Hz, 1H), 7.37 (dd, *J* = 8.7, 5.9 Hz, 3H), 7.28 (s, 1H), 6.87 – 6.79 (m, 4H), 6.45 (d, *J* = 2.2 Hz, 1H), 3.94 (dd, *J* = 12.9, 5.1 Hz, 9H), 3.85 (s, 3H), 3.72 (d, *J* = 6.6 Hz, 2H), 3.48 (d, *J* = 1.5 Hz, 2H), 2.07 (dd, *J* = 13.3, 6.7 Hz, 1H), 1.02 (t, *J* = 5.0 Hz, 6H). <sup>13</sup>C NMR (101 MHz, CDCl<sub>3</sub>) δ (ppm) 192.60, 160.89, 159.30, 158.95, 155.41, 155.21, 150.45, 149.39, 145.40, 139.71, 138.49, 131.43, 130.25, 129.91, 129.60, 128.64, 127.93, 124.77, 117.17, 114.77, 107.49, 107.27, 105.06, 104.18, 101.32, 97.47, 74.46, 56.23, 56.10, 55.63, 55.46, 36.54, 31.52, 28.25, 25.59, 19.24. MS (ESI): calcd. for C<sub>32</sub>H<sub>34</sub>O<sub>6</sub>, [M + H]<sup>+</sup>, 515.2428 found 515.2425

### 3. $^1\text{H}$ NMR, $^{13}\text{C}$ NMR and HR-MS spectra of representative compounds.

#### $^1\text{H}$ NMR of compound PIF\_1

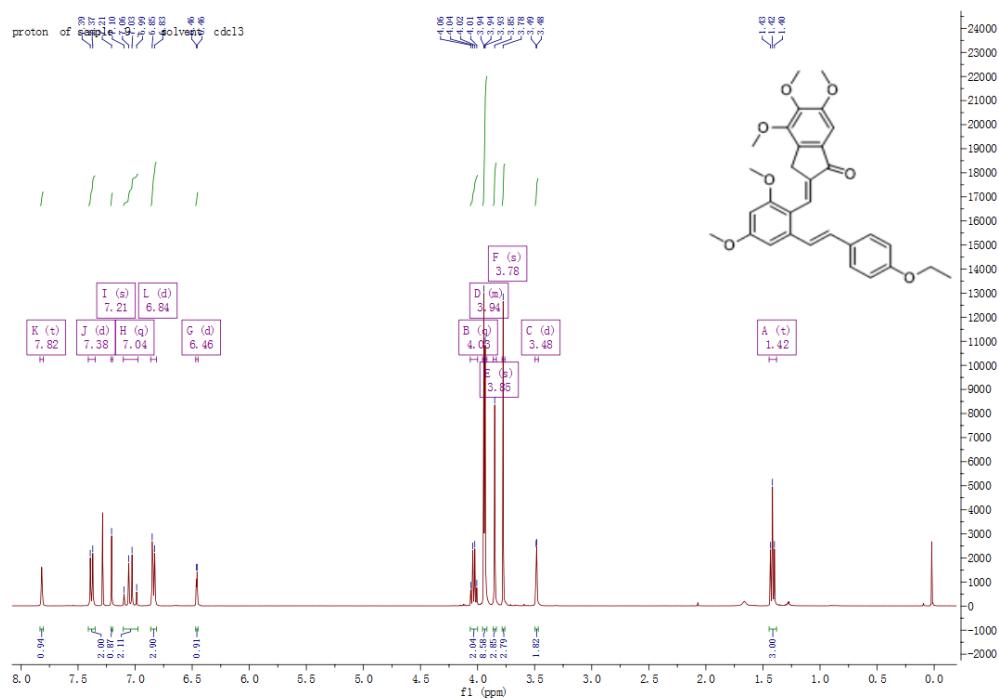

#### $^{13}\text{C}$ NMR of compound PIF\_1

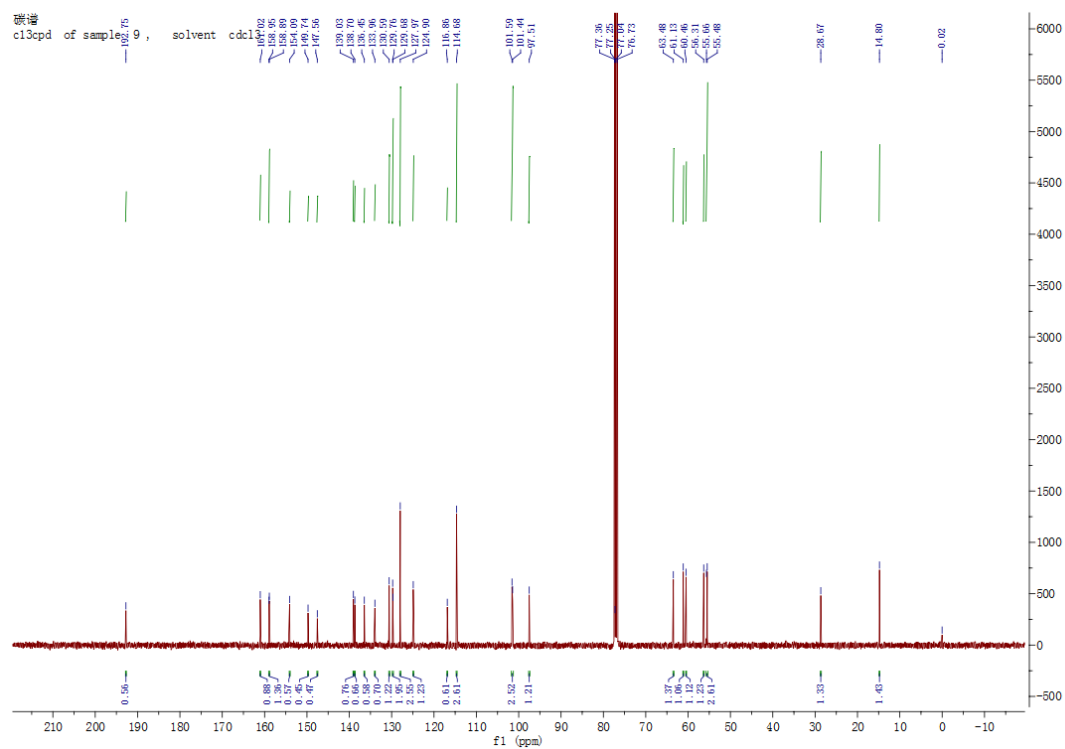

## HR-MS of compound PIF\_1

HFUT-184

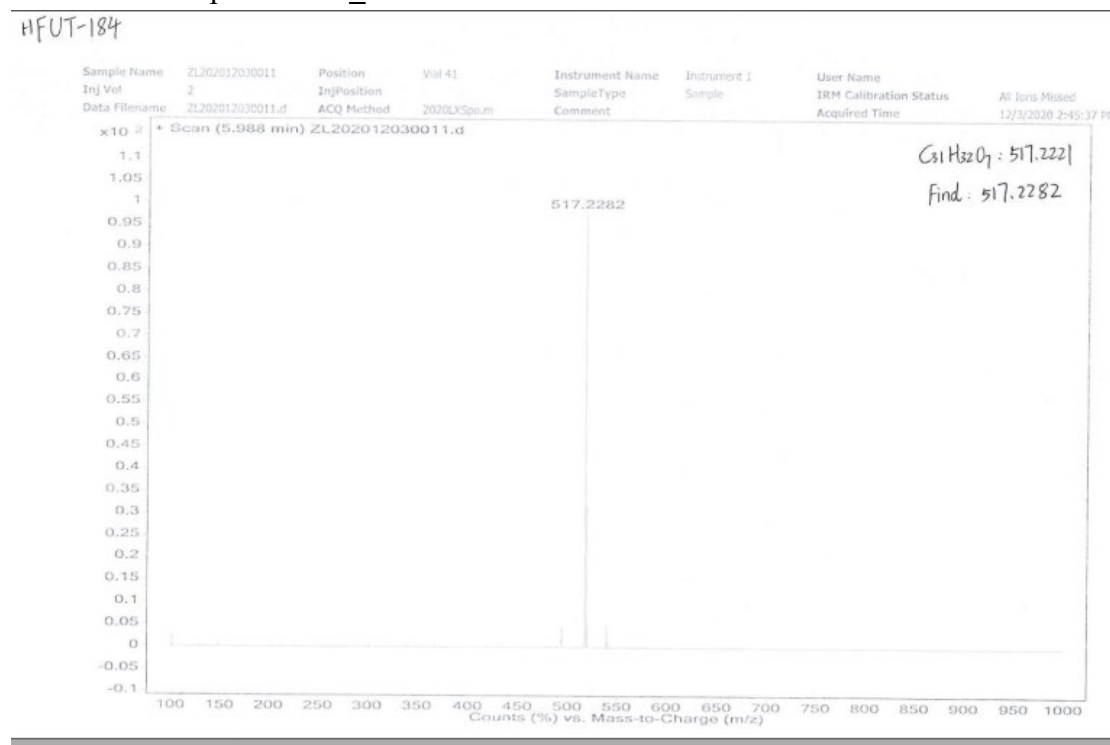

## <sup>1</sup>H NMR of compound PIF\_2



| Sample Name   | HFUT-191   | Position     | Viol 41      | Instrument Name | Instrument 1 | User Name                               |
|---------------|------------|--------------|--------------|-----------------|--------------|-----------------------------------------|
| Inj Vol       | 2          | Inj Position |              | Sample Type     | Sample       | IRM Calibration Status                  |
| Data Filename | HFUT-191.d | ACQ Method   | 2020LXSp.o.m | Comment         |              | Acquired Time                           |
|               |            |              |              |                 |              | All Ions Missed<br>12/2/2020 9:10:17 PM |

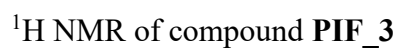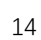

### $^{13}\text{C}$ NMR of compound PIF\_3

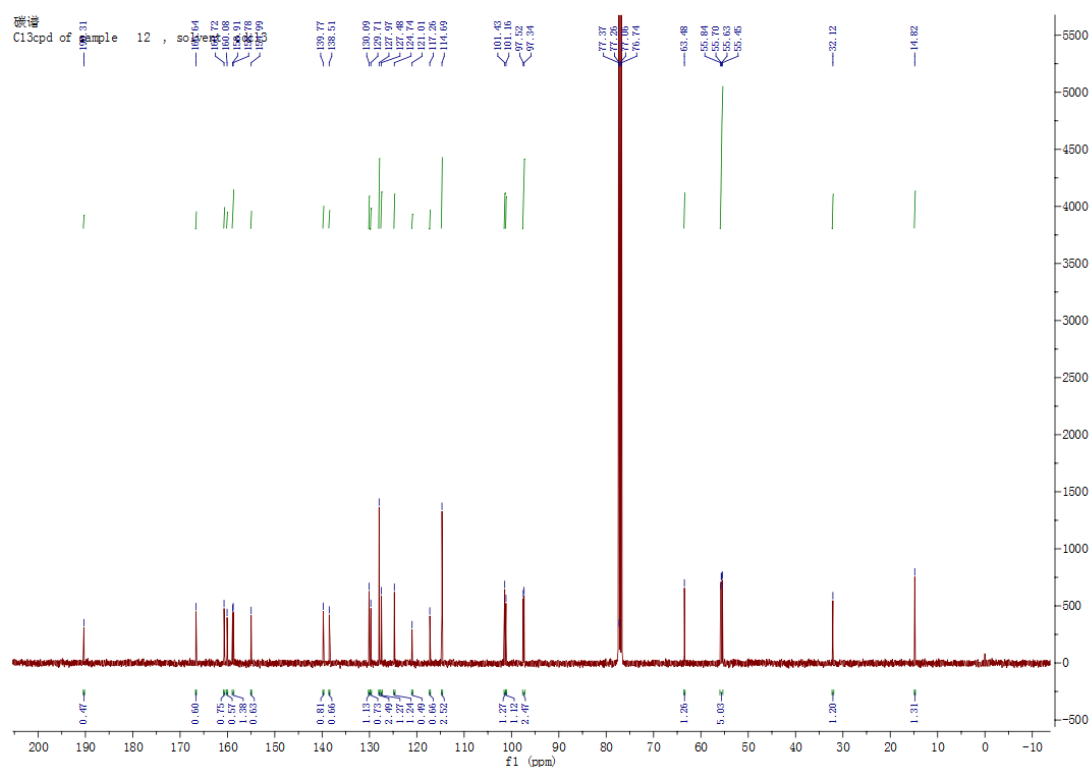

### HR-MS of compound PIF\_3

HFUT-189

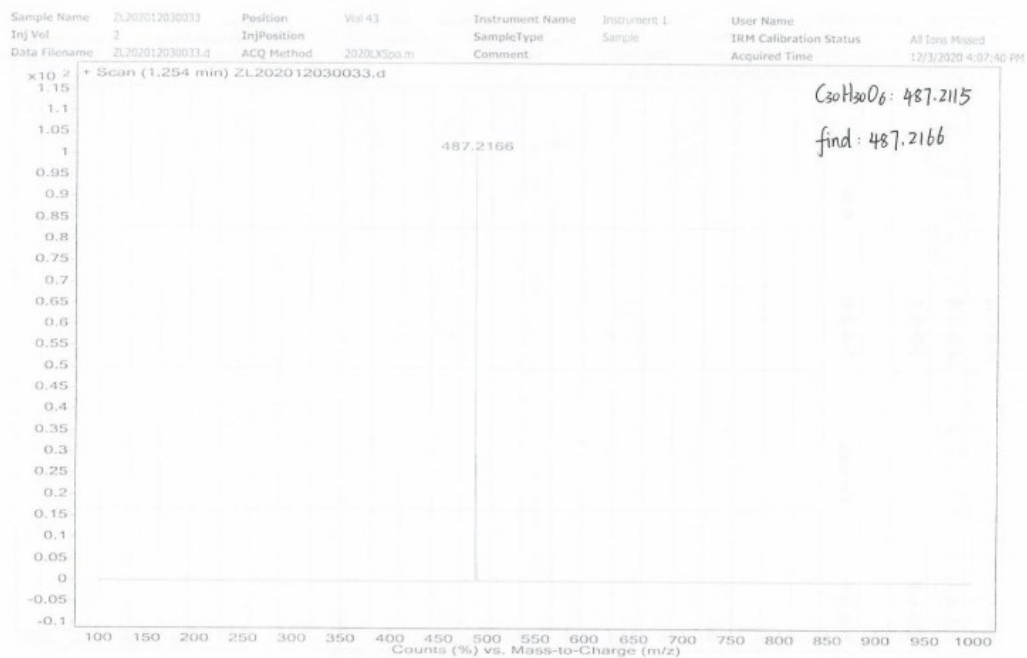

# <sup>1</sup>H NMR of compound **PIF\_4**

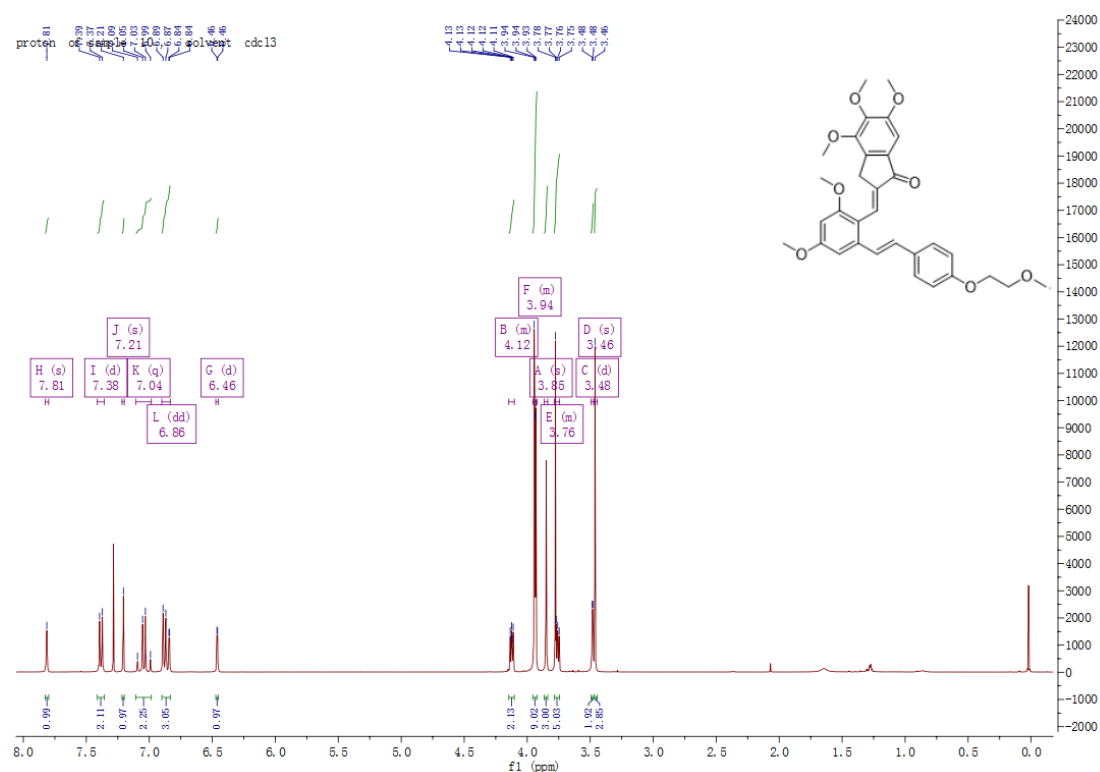

# <sup>13</sup>C NMR of compound **PIF\_4**

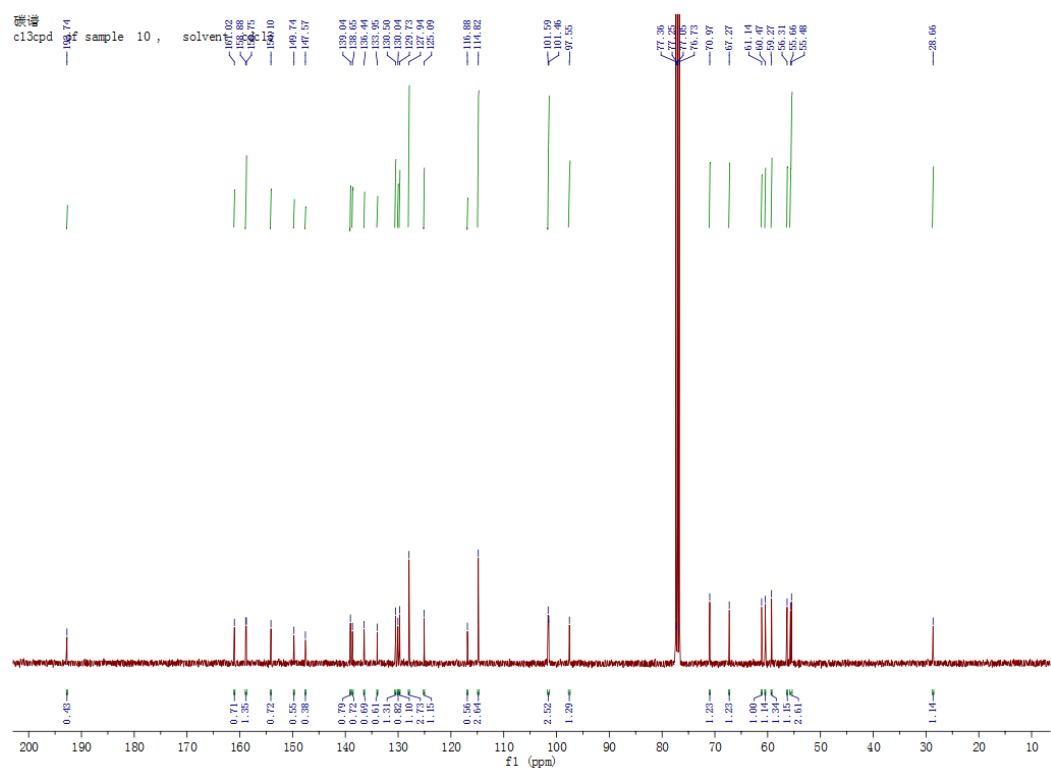



# HR-MS of compound PIF\_4

187

|               |                  |             |           |                 |              |                        |                      |
|---------------|------------------|-------------|-----------|-----------------|--------------|------------------------|----------------------|
| Sample Name   | ZL202012030012   | Position    | Vial 42   | Instrument Name | Instrument 1 | User Name              |                      |
| Inj Vol       | 2                | InjPosition |           | SampleType      | Sample       | IRM Calibration Status | All Ions Missed      |
| Data Filename | ZL202012030012.d | ACQ Method  | 2020UXSpm | Comment         |              | Acquired Time          | 12/3/2020 2:52:24 PM |

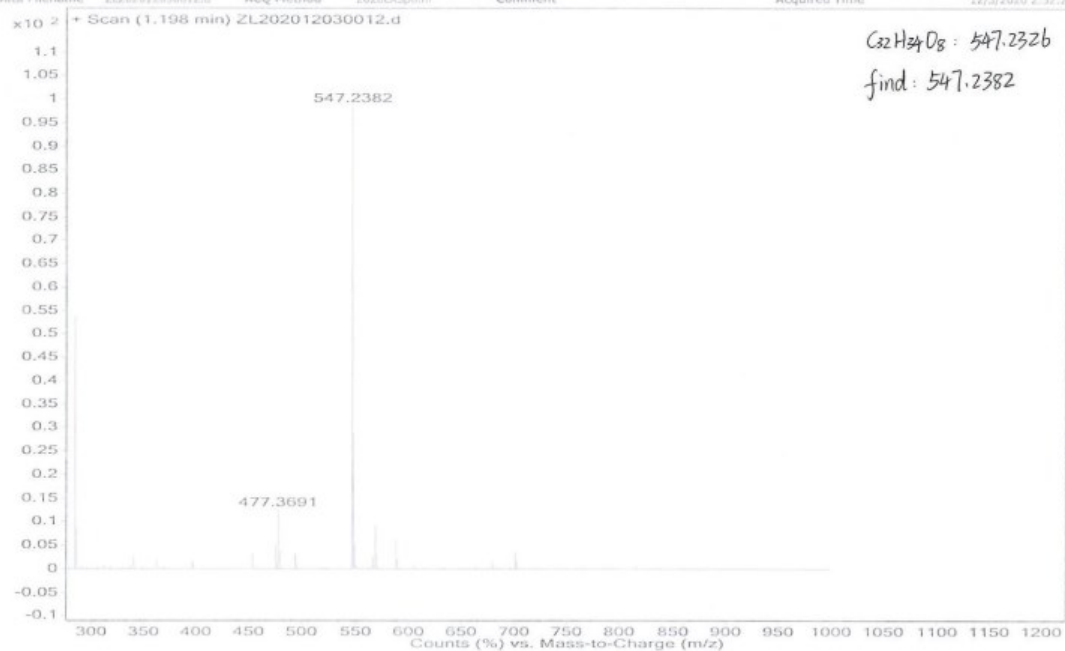

# $^1H$ NMR of compound PIF\_5

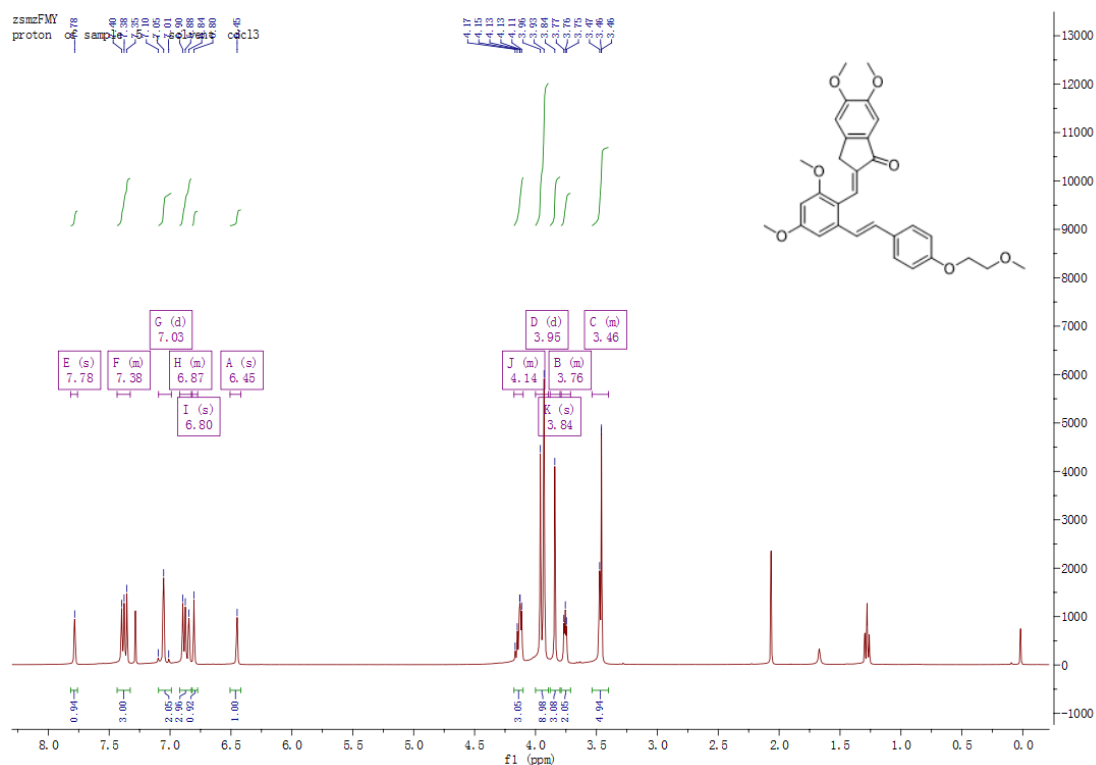

# <sup>13</sup>C NMR of compound PIF\_5

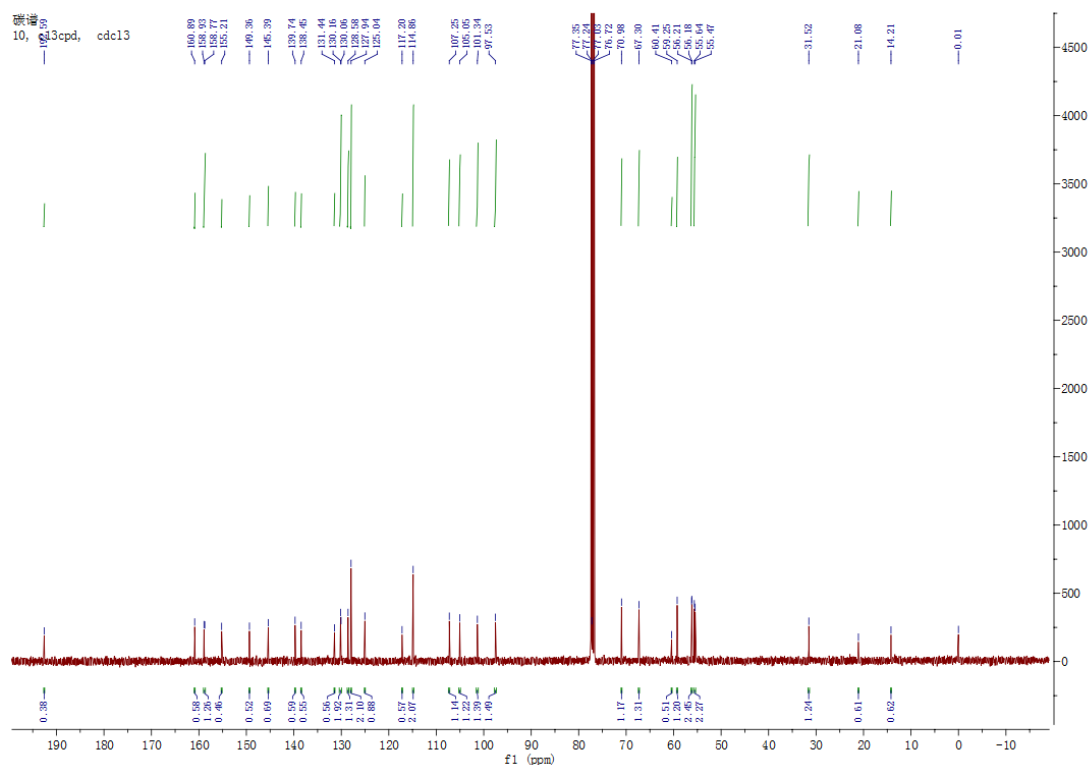

# HR-MS of compound PIF\_5

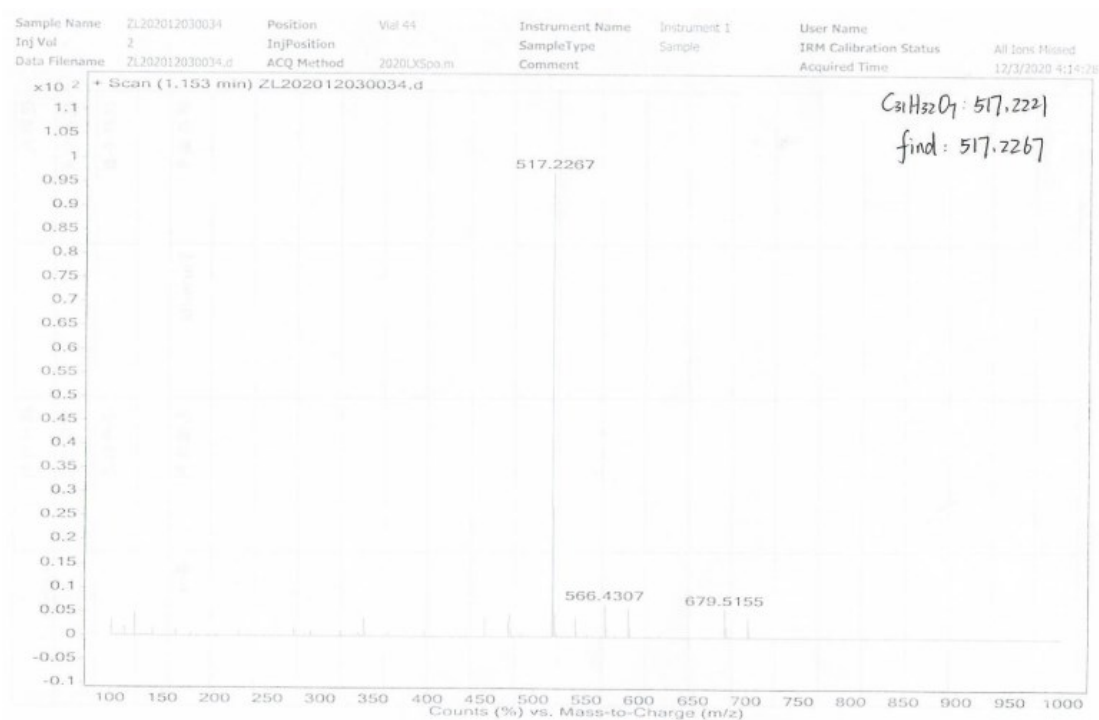

# <sup>1</sup>H NMR of compound PIF\_6

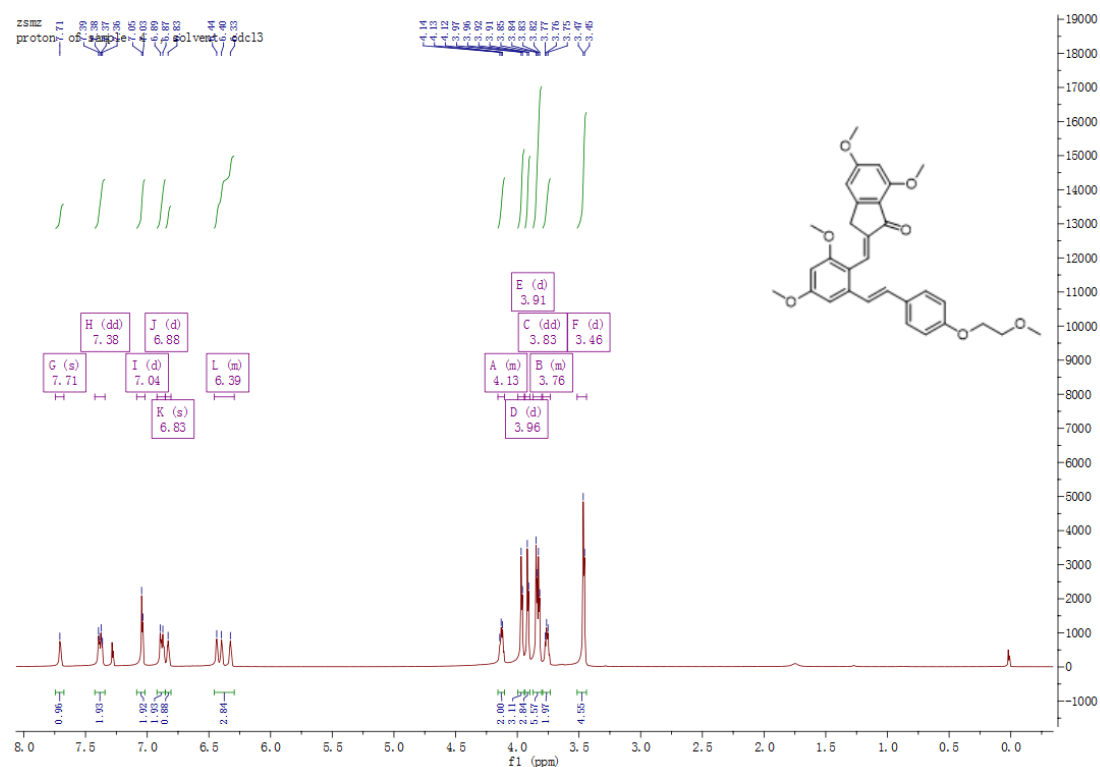

# <sup>13</sup>C NMR of compound PIF\_6

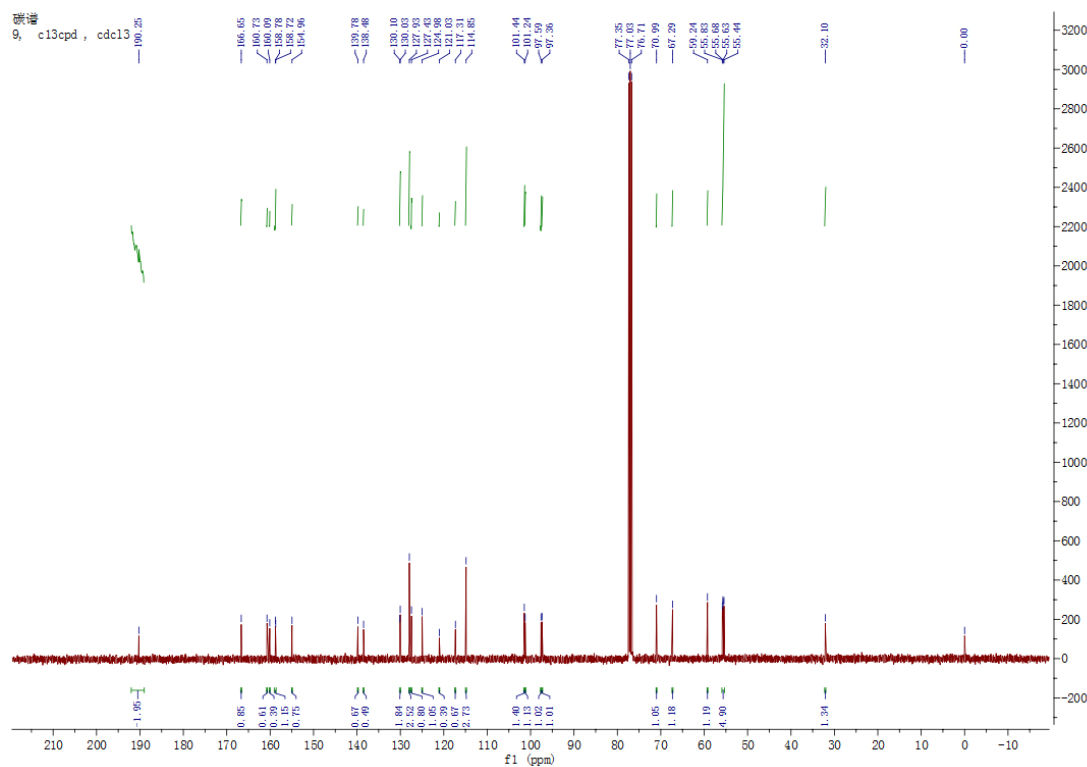

## HR-MS of compound PIF\_6

1H NMR

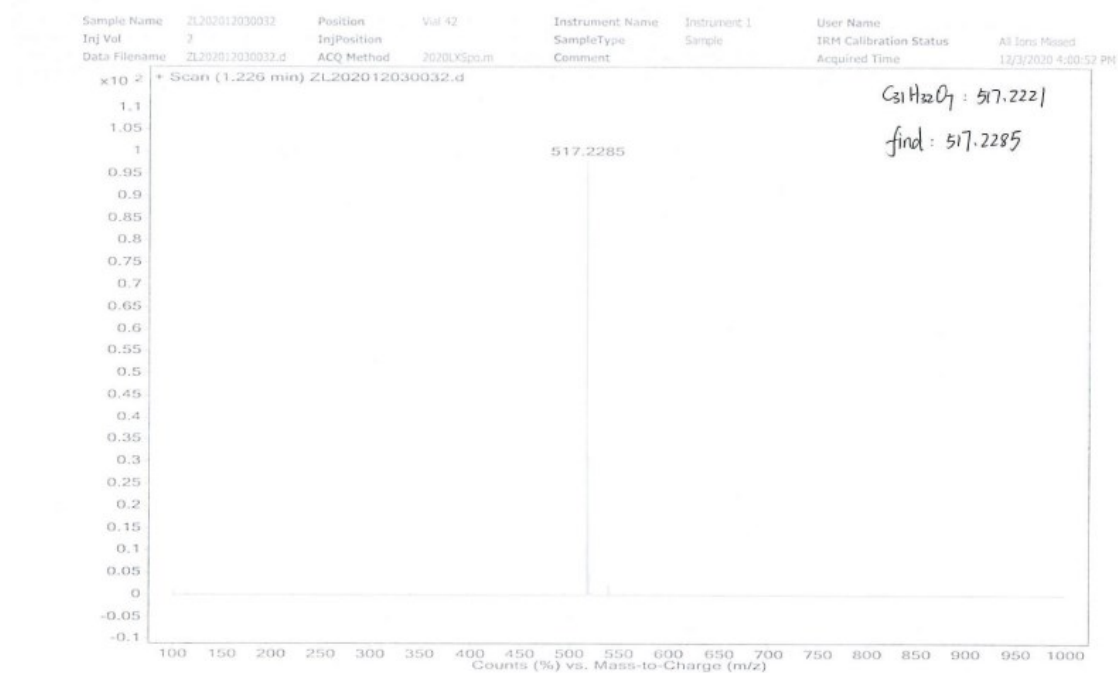

## $^1H$ NMR of compound PIF\_7

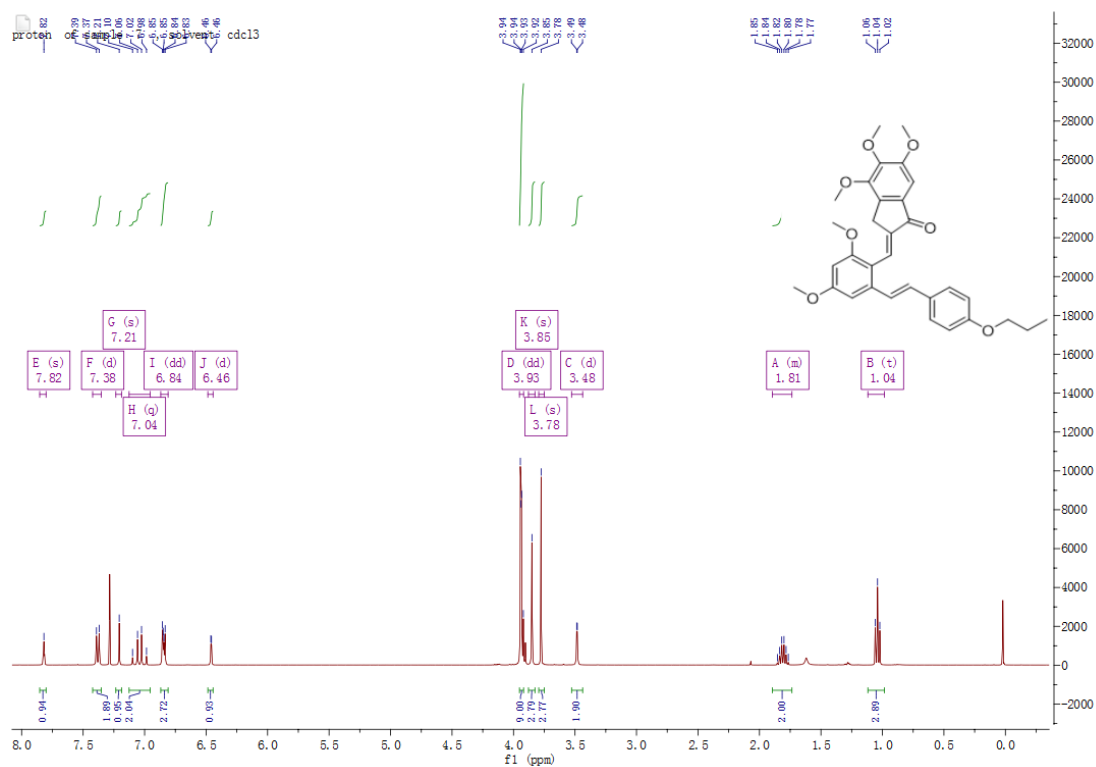

# <sup>13</sup>C NMR of compound PIF\_7

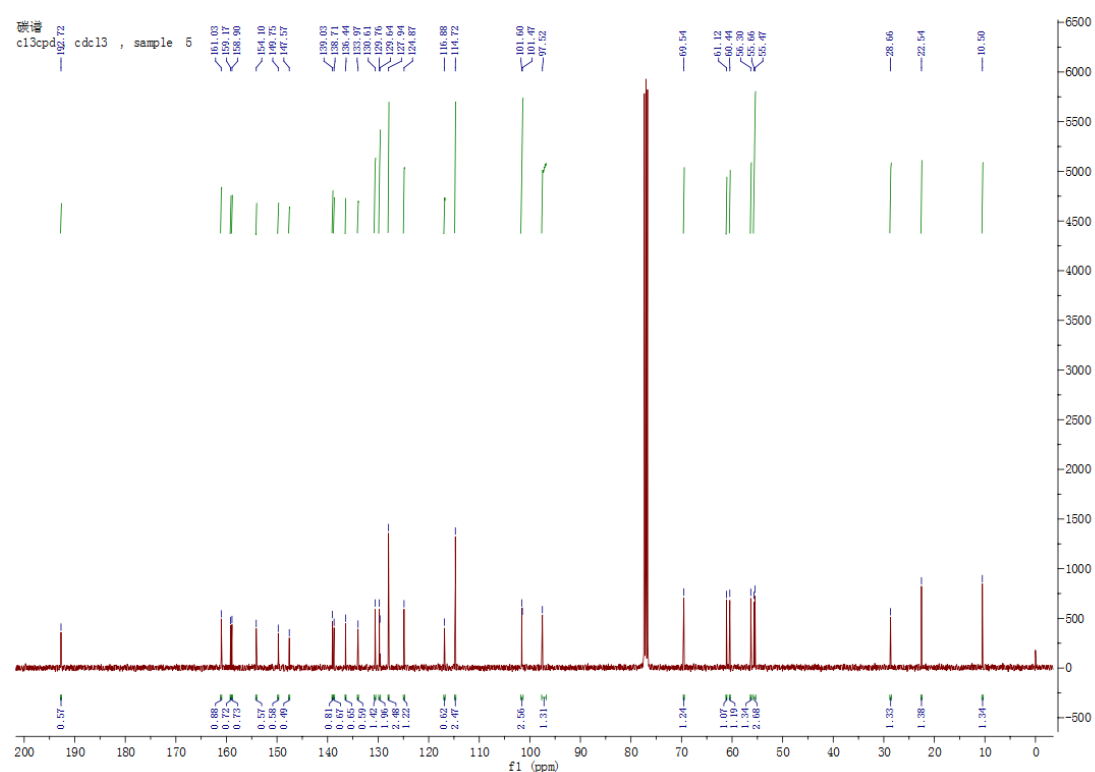

# HR-MS of compound PIF\_7

ZZHRUT#402-448 RT: 3.86-4.20 AV: 13 NL: 48557  
T: FTMS-p ESIFulms [100.0000-1500.0000]

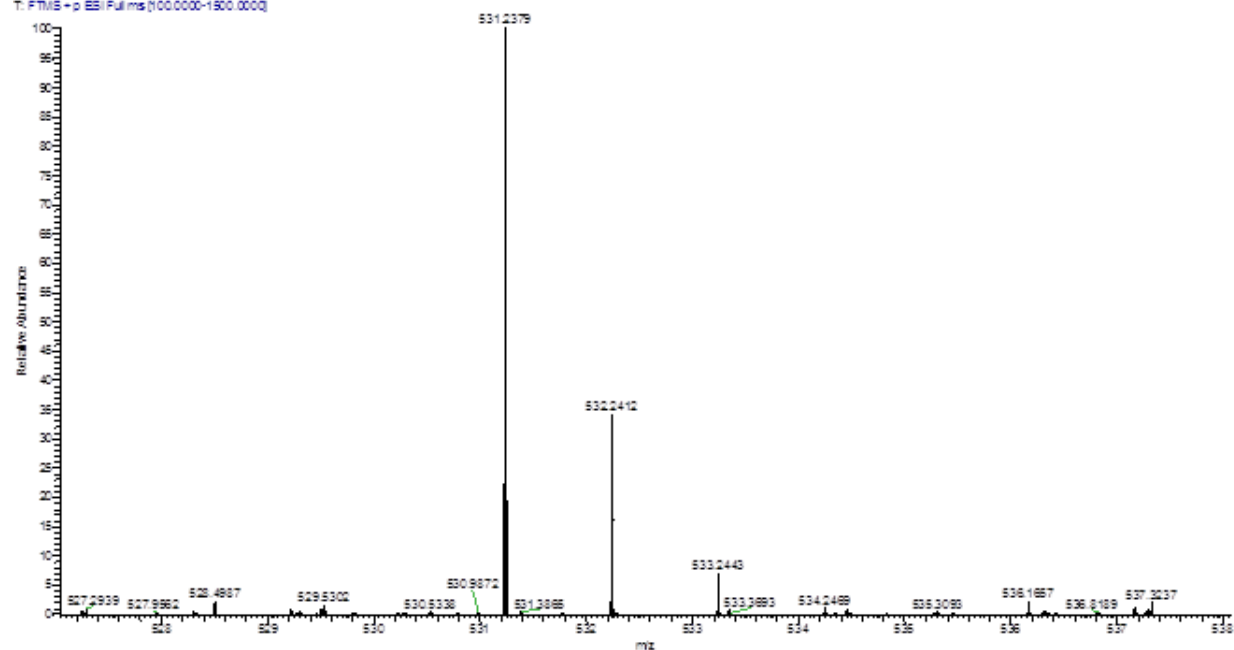

# <sup>1</sup>H NMR of compound PIF\_8

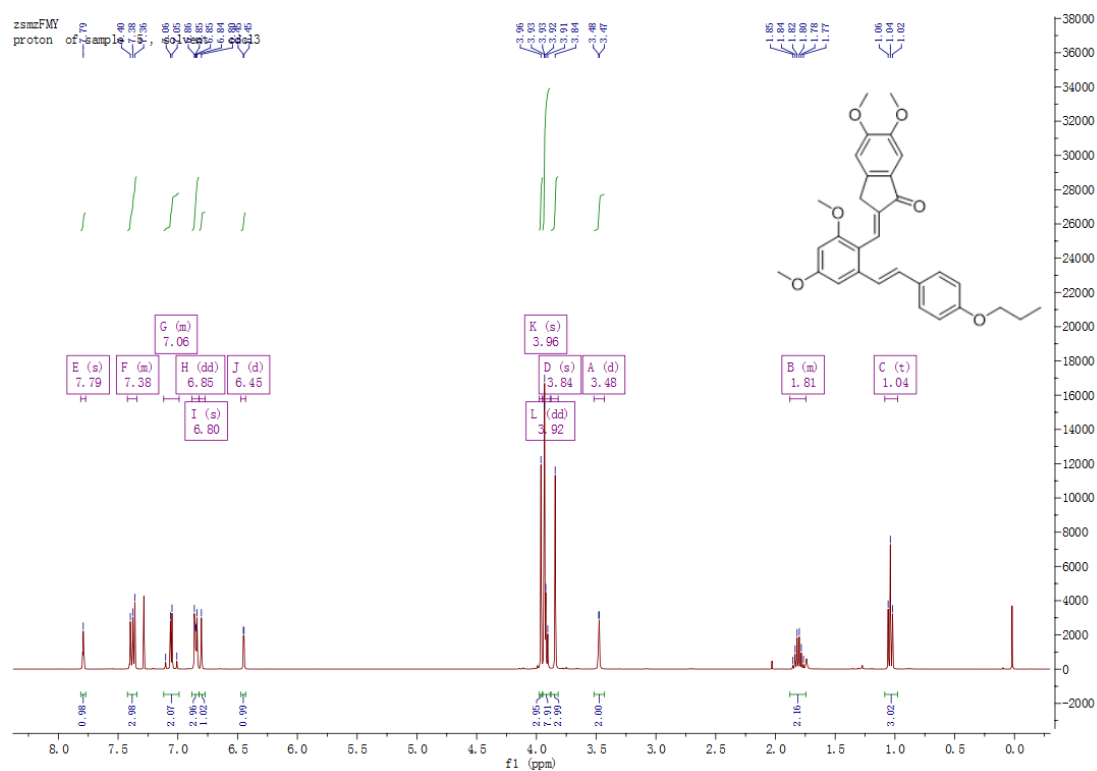

# <sup>13</sup>C NMR of compound PIF\_8

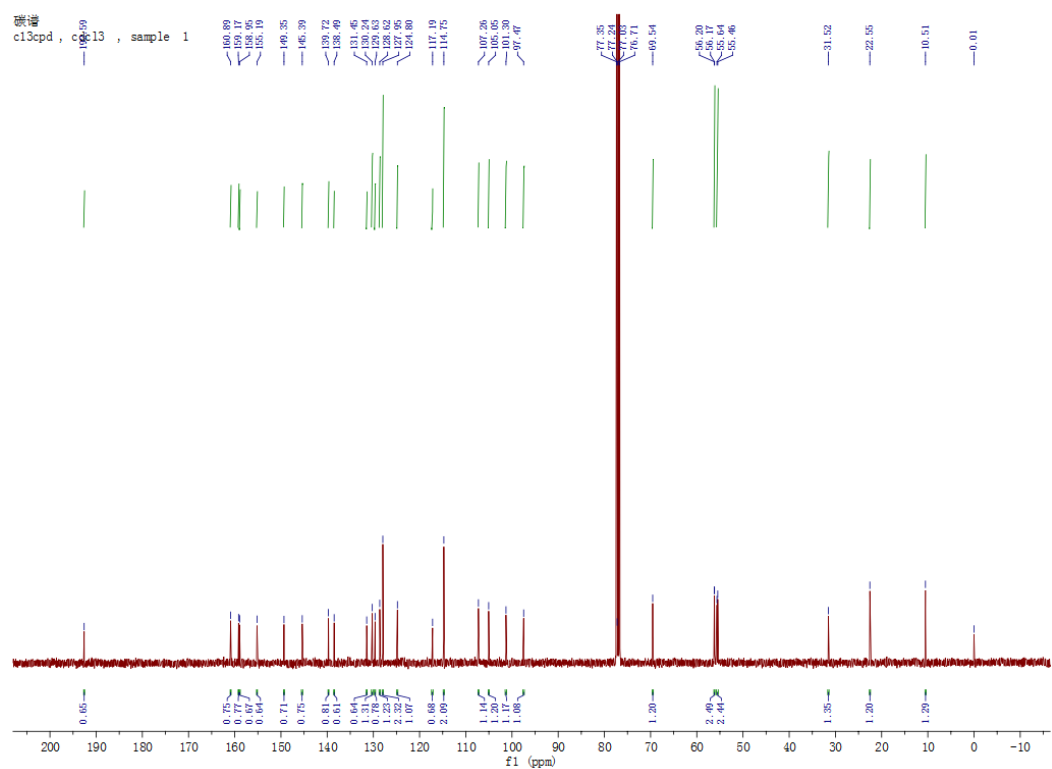

## HR-MS of compound PIF\_8

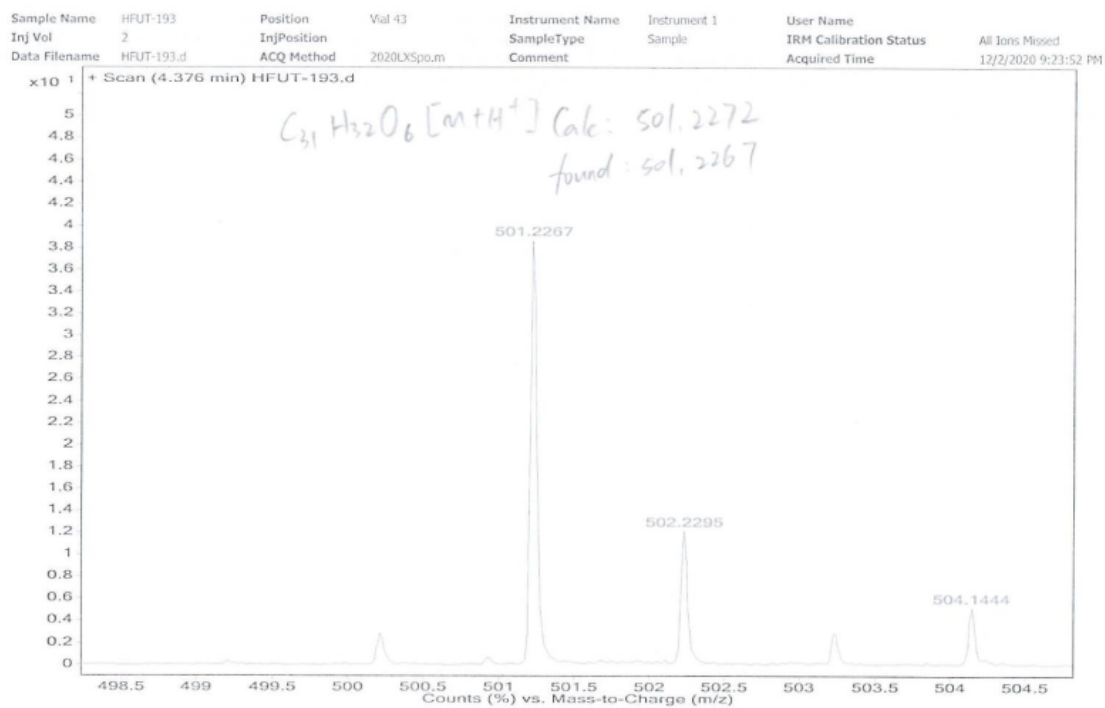

## $^1H$ NMR of compound PIF\_9

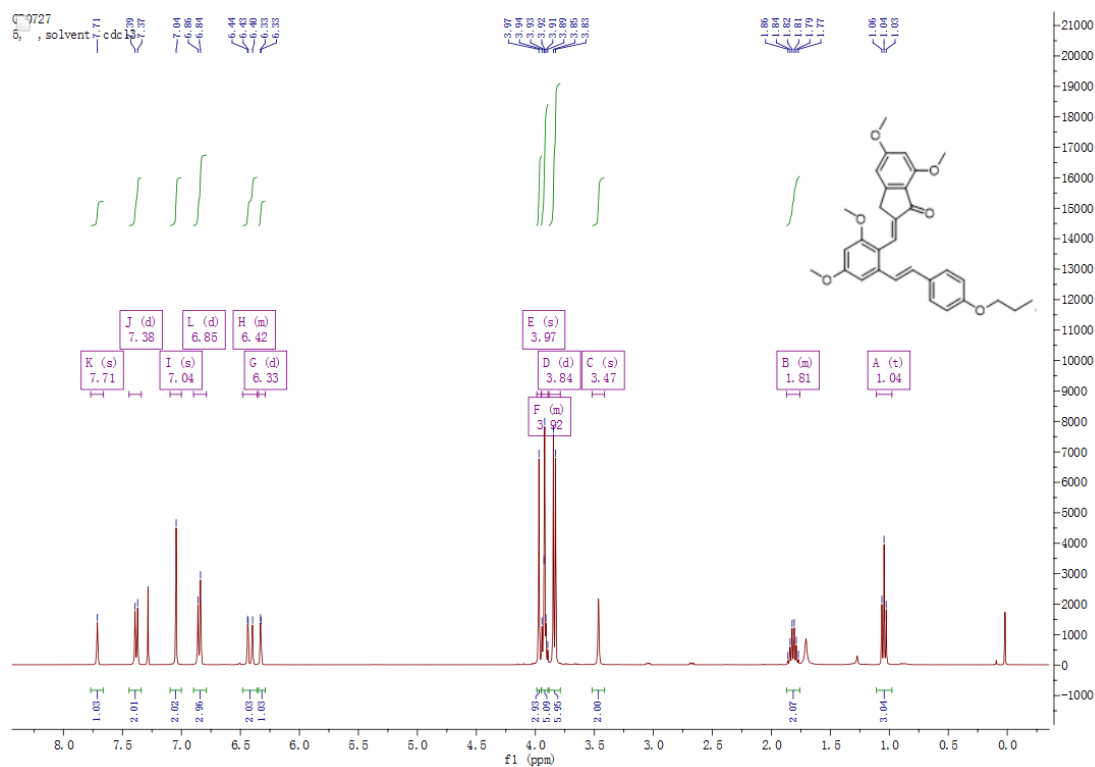

# <sup>13</sup>C NMR of compound PIF\_9

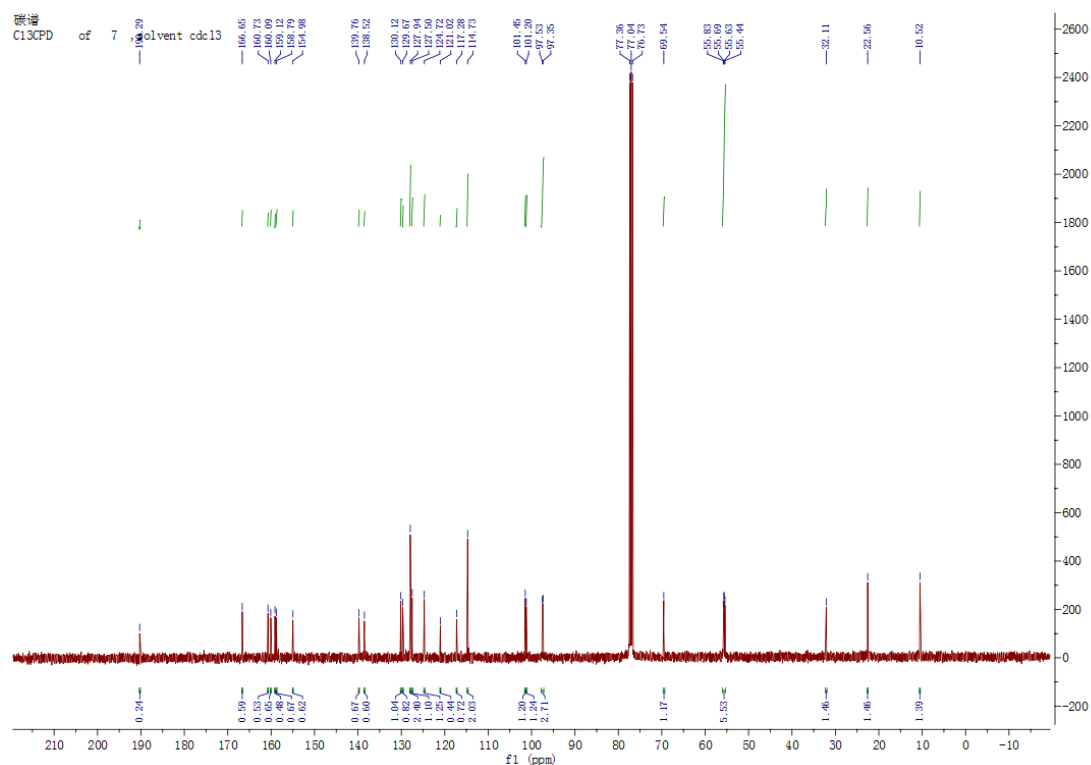

# HR-MS of compound PIF\_9

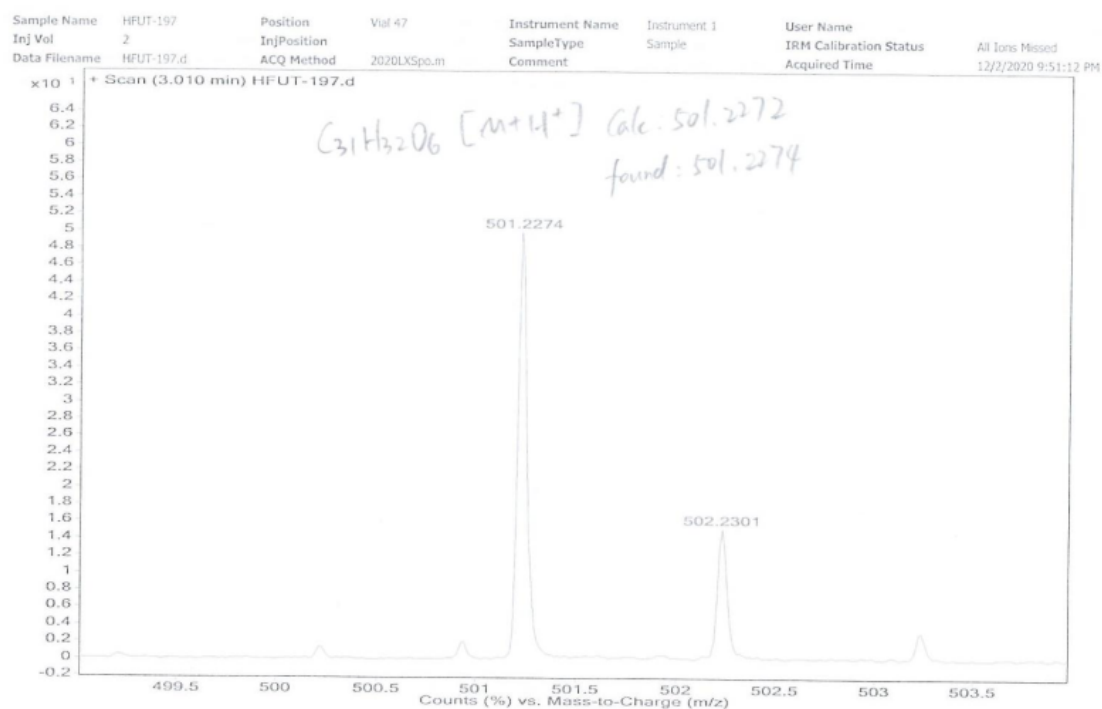



# <sup>1</sup>H NMR of compound PIF\_10

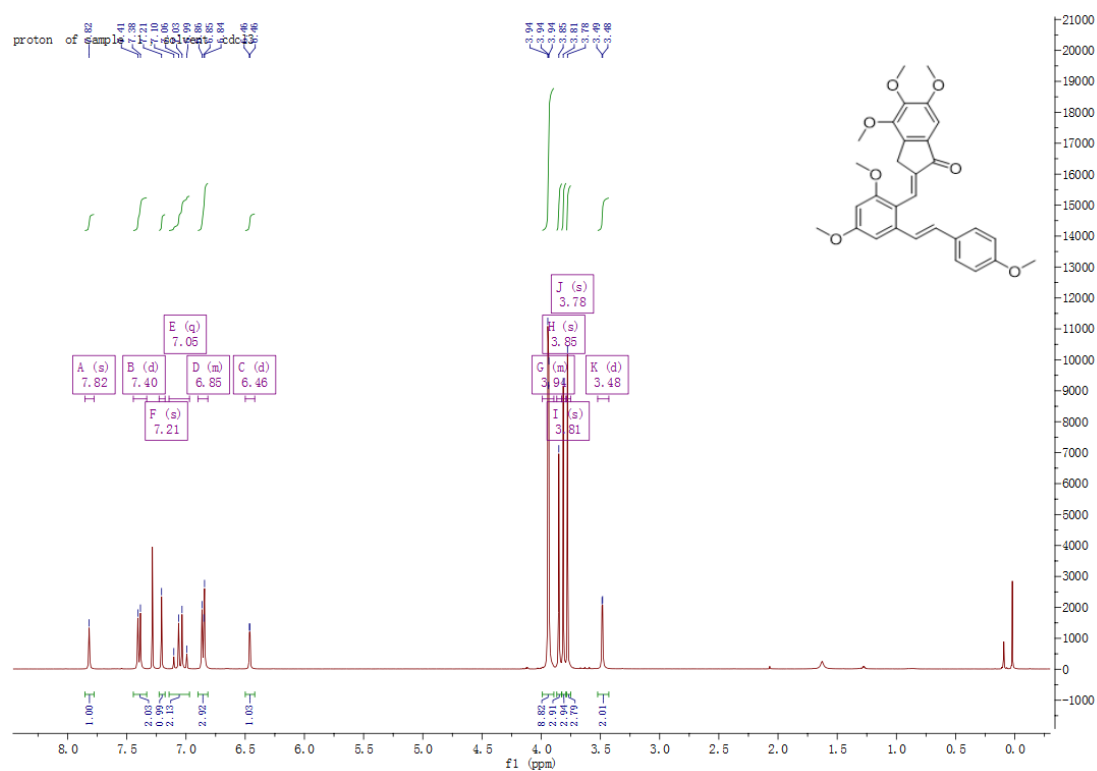

# <sup>13</sup>C NMR of compound PIF\_10

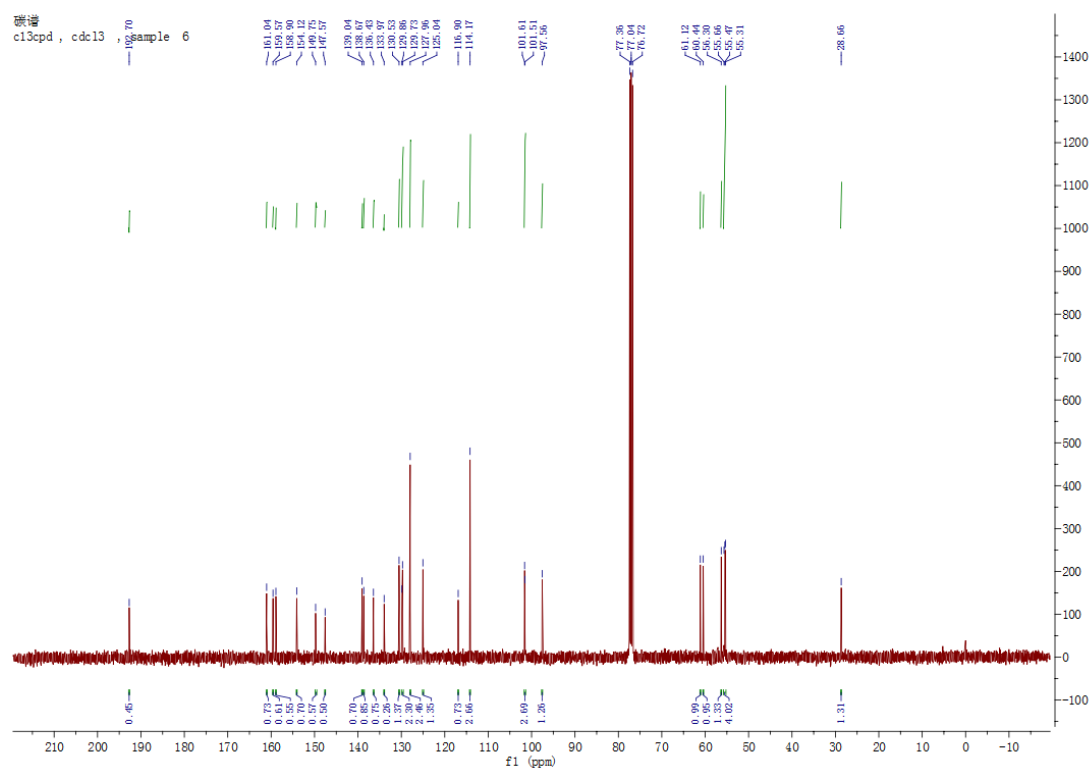

|               |            |             |            |                 |              |                        |                      |
|---------------|------------|-------------|------------|-----------------|--------------|------------------------|----------------------|
| Sample Name   | HFUT-195   | Position    | Vial 45    | Instrument Name | Instrument 1 | User Name              |                      |
| Inj Vol       | 2          | InjPosition |            | SampleType      | Sample       | IRM Calibration Status | All Ions Missed      |
| Data Filename | HFUT-195.d | ACQ Method  | 2020LXSp.m | Comment         |              | Acquired Time          | 12/2/2020 9:37:31 PM |

+ Scan (3.165 min) HFUT-195.d

$C_{30}H_{30}O_7$   $[M+H]^+$  Calc: 503.2064  
found: 503.2060

Counts (%) vs. Mass-to-Charge (m/z)

Chemical structure of compound 1: COc1ccc(cc1)/C=C/c2cc(OC)c3c(c2)C(=O)c4cc(OC)c(OC)c43

<sup>1</sup>H NMR spectrum (CDCl<sub>3</sub>) of compound 1. The x-axis represents the chemical shift in ppm (f1), ranging from 0.0 to 8.0. The y-axis represents the intensity in arbitrary units, ranging from -1000 to 18000. The spectrum shows several peaks corresponding to the protons in the molecule.

Peak assignments and integrations:

- Peak A (d): 3.47 ppm, integration 2.00
- Peak B (m): 3.84 ppm, integration 2.11
- Peak C (s): 3.97 ppm, integration 2.11
- Peak D (d): 3.93 ppm, integration 2.11
- Peak E (s): 7.72 ppm, integration 1.02
- Peak F (d): 7.40 ppm, integration 2.11
- Peak G (s): 7.05 ppm, integration 2.01
- Peak H (dd): 6.85 ppm, integration 3.01
- Peak I (m): 6.43 ppm, integration 2.10
- Peak J (s): 6.33 ppm, integration 1.10

# <sup>13</sup>C NMR of compound PIF\_11

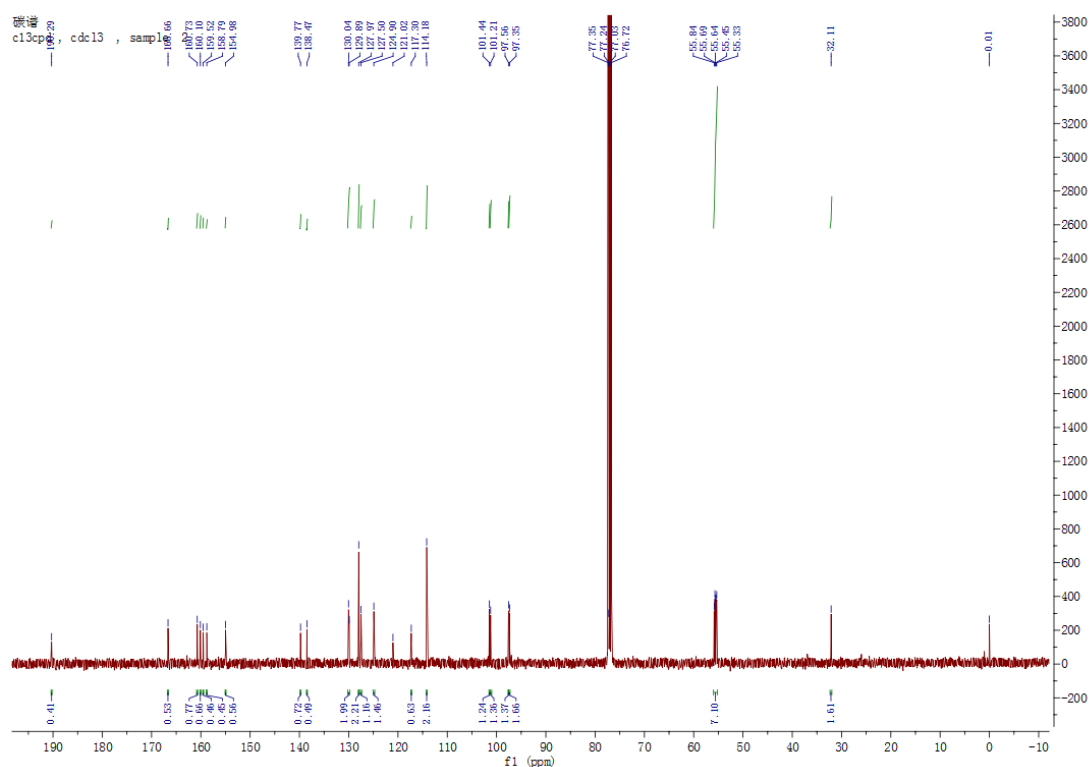

# HR-MS of compound PIF\_11

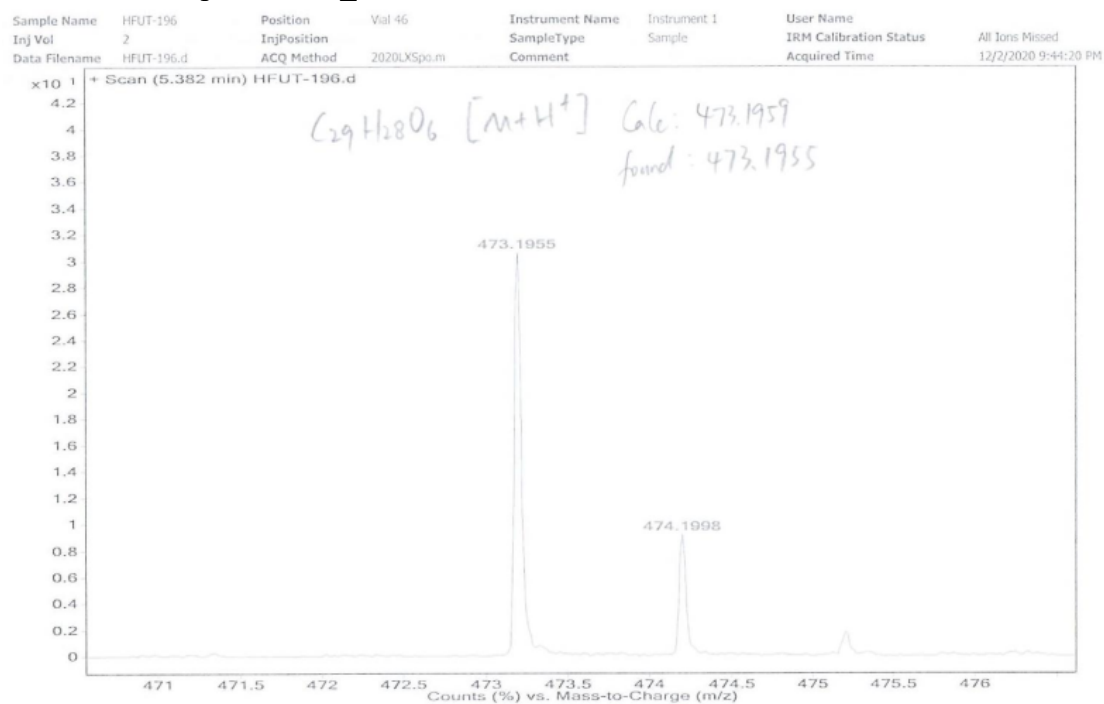

# <sup>1</sup>H NMR of compound PIF\_12

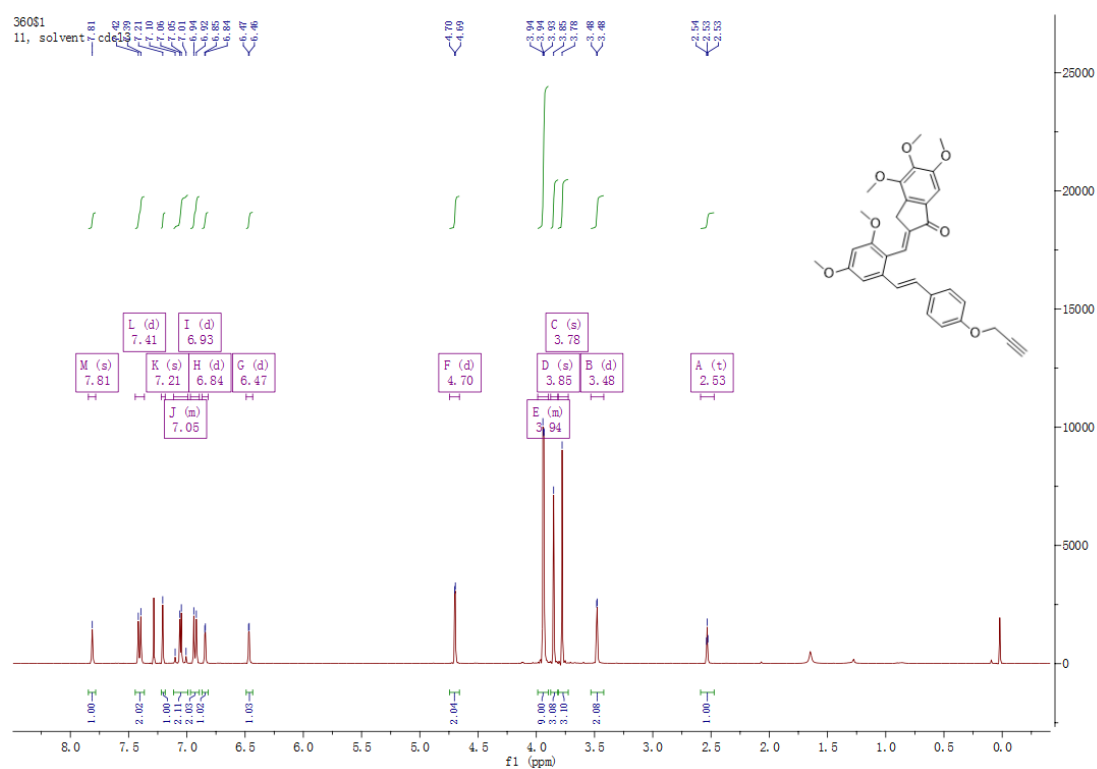

# <sup>13</sup>C NMR of compound PIF\_12

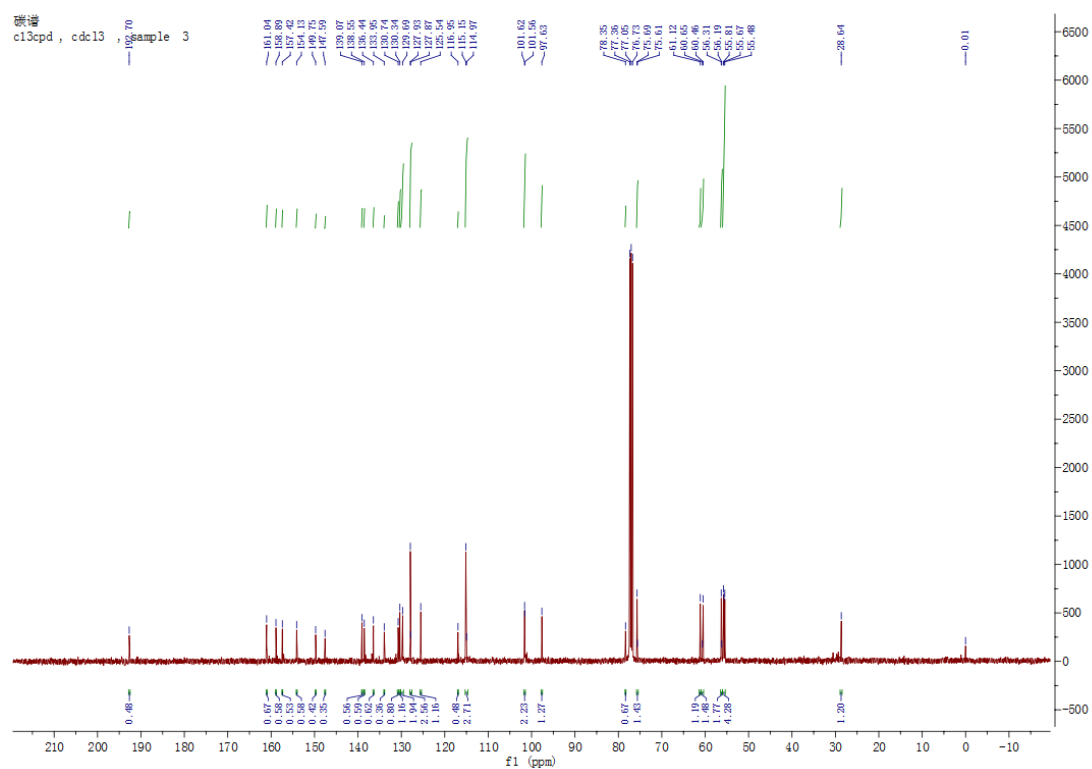

## HR-MS of compound PIF\_12

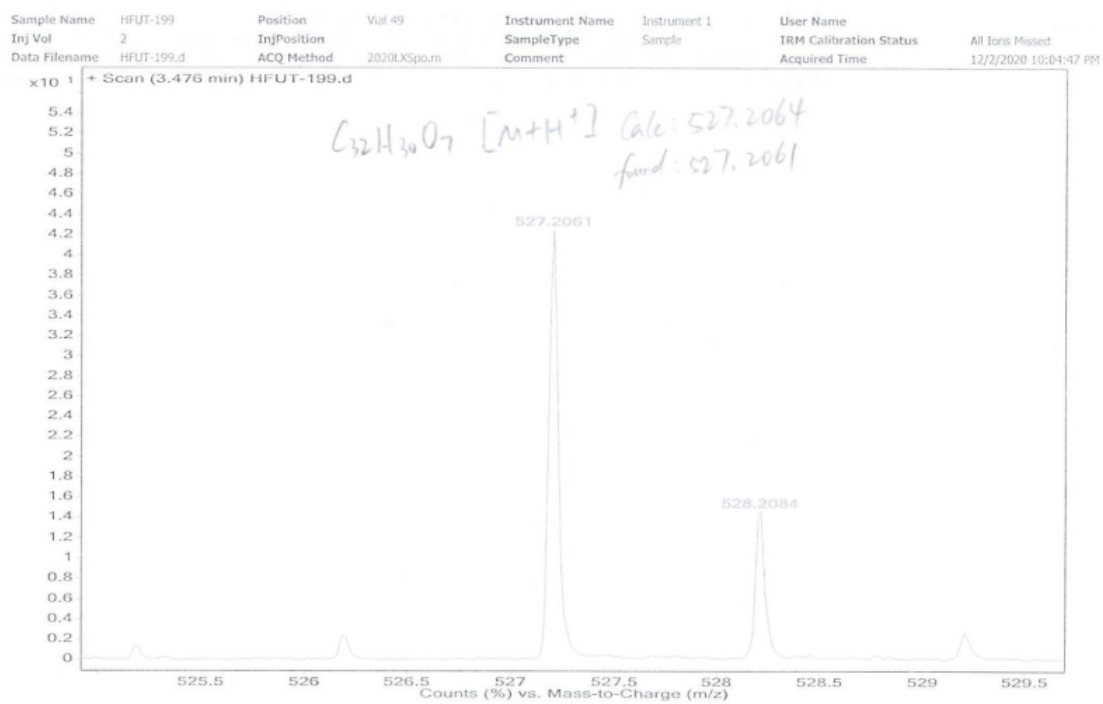

## <sup>1</sup>H NMR of compound PIF\_15

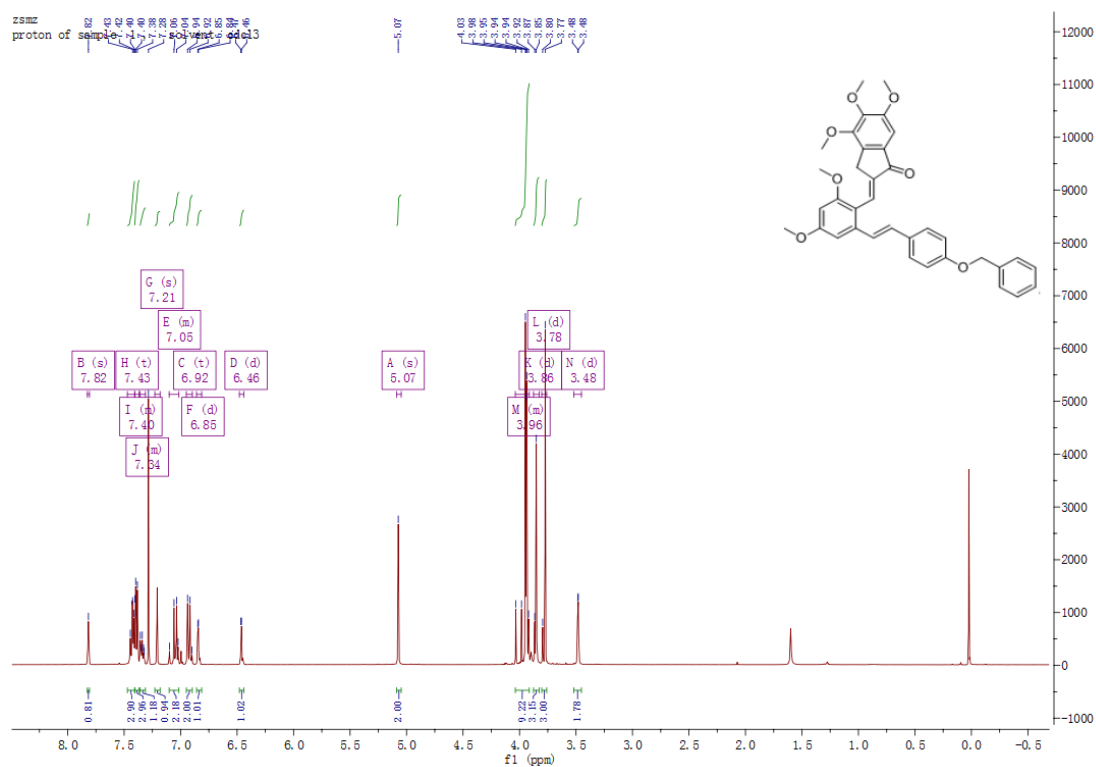

# $^{13}\text{C}$ NMR of compound PIF\_15

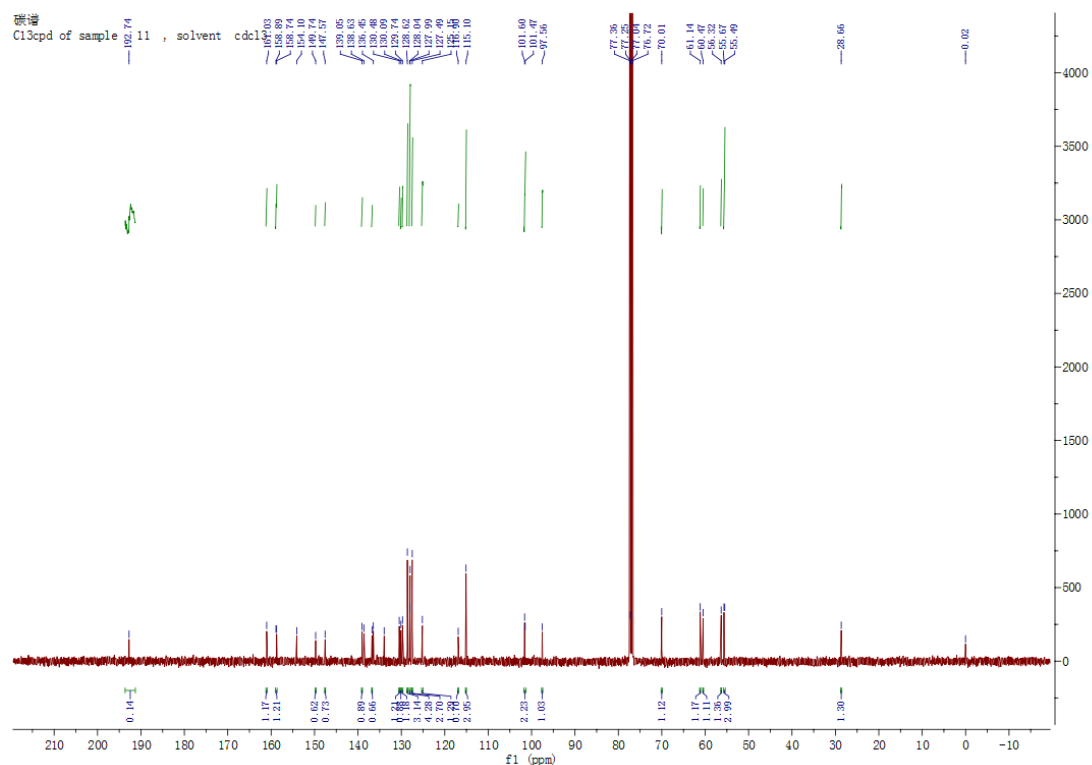

# HR-MS of compound PIF\_15

PIF-18b

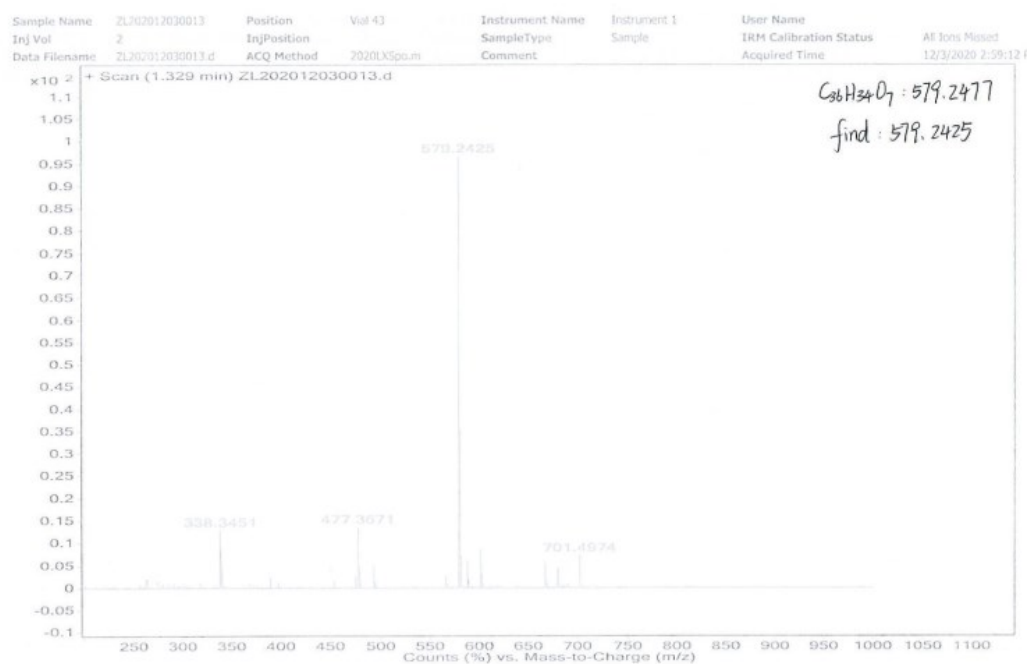

Supplement: s1 [file s1]
